Review Article

# Neural mechanisms underlying nicotine addiction: acute positive reinforcement and withdrawal

Shelly S. Watkins, George F. Koob, Athina Markou

**The neurobiology of nicotine addiction is reviewed within the context of neurobiological and behavioral theories postulated for other drugs of abuse. The roles of various neurotransmitter systems, including acetylcholine, dopamine, serotonin, glutamate, gamma-aminobutyric acid, and opioid peptides in acute nicotine reinforcement and withdrawal from chronic administration are examined followed by a discussion of potential neuroadaptations within these neurochemical systems that may lead to the development of nicotine dependence. The link between nicotine administration, depression and schizophrenia are also discussed. Finally, a theoretical model of the neurobiological mechanisms underlying acute nicotine withdrawal and protracted abstinence involves alterations within dopaminergic, serotonergic, and stress systems that are hypothesized to contribute to the negative affective state associated with nicotine abstinence.**

## Introduction

Evidence indicates that people smoke primarily to experience the psychopharmacological properties of nicotine and that the majority of smokers eventually become dependent upon nicotine (Balfour, 1984; Stolerman, 1991). The high addictive potential of nicotine is indicated by the vast number of people who habitually smoke, an estimated 25% of the US population (Substance Abuse and Mental Health Services Administration, 1993). Tobacco smoking is the leading, *avoidable* cause of disease and premature death in the US,

responsible for over 500,000 deaths annually and contributing to about 40 diseases (United States Department of Health and Human Services, 1988). In view of the pervasiveness of tobacco use and the far-reaching costs to smokers and society, there has been increased interest in elucidating the actions of nicotine within the central nervous system that lead to acute positive reinforcement and potential neuroadaptations which mediate the development of dependence and withdrawal symptoms.

In humans, nicotine produces positive reinforcing effects including mild euphoria (Pomerleau & Pomerleau, 1992), increased energy, heightened arousal, reduced stress and anxiety, and appetite suppression (Benowitz, 1996; Stolerman & Jarvis, 1995). Cigarette smokers report that smoking produces arousal, particularly with the first cigarette of the day, and relaxation when under stress (Benowitz, 1988). A nicotine abstinence syndrome after chronic nicotine exposure has been characterized in both humans (Hughes, Gust, Skoog, Kennan, & Fenwick, 1991; Shiffman & Jarvik, 1976) and rats (Epping-Jordan, Watkins, Koob, & Markou, 1998b; Hildebrand, Nomikos, Bondjers, Nisell, & Svensson, 1997; Malin *et al.*, 1992; Malin, Lake, Carter, Cunningham, & Wilson, 1993; Malin *et al.*, 1994; Watkins, Stinus, Koob, & Markou, 2000), and has both somatic and affective components. In humans,

---

Shelly S. Watkins, Division of Psychopharmacology, Department of Neuropharmacology, The Scripps Research Institute, La Jolla, CA 92037, and Department of Psychology, University of California, San Diego, La Jolla, CA 92093; George F. Koob, Division of Psychopharmacology, Department of Neuropharmacology, The Scripps Research Institute, La Jolla, CA 92037, Departments of Psychology and Psychiatry, University of California, San Diego, La Jolla, CA 92093; and Athina Markou, Division of Psychopharmacology, Department of Neuropharmacology, The Scripps Research Institute, La Jolla, CA 92037; and Department of Psychiatry, University of California, San Diego, La Jolla, CA 92093, U.S.A.

Correspondence to: Athina Markou, Division of Psychopharmacology, Department of Neuropharmacology, The Scripps Research Institute, 10550 North Torrey Pines Road, CVN-7, La Jolla, CA 92037, USA. Tel: (858) 784-7244; Fax: (858) 784-7405; E-mail: amarkou@scripps.edu

acute nicotine withdrawal is characterized by somatic symptoms, such as bradycardia, gastrointestinal discomfort, and increased appetite leading to weight gain, as well as affective symptoms including depressed mood, dysphoria, irritability, anxiety, frustration, increased reactivity to environmental stimuli, and difficulty concentrating (American Psychiatric Association, 1994; Hughes *et al.*, 1991). The enduring symptoms of nicotine withdrawal (protracted abstinence) include continued affective changes, such as depressed mood (Hughes *et al.*, 1991), with abstinent smokers often reporting powerful cravings for tobacco (Hughes, Hatsukami, Pickens, Krahn, Malin, & Luknic, 1984). While the somatic symptoms of drugs of abuse are unpleasant and annoying, it has been hypothesized that avoidance of the affective components of drug withdrawal, including those associated with nicotine withdrawal, plays a more important role in the maintenance of nicotine dependence than the somatic symptoms of withdrawal (Koob, Markou, Weiss, & Schulteis, 1993; Markou, Kosten, & Koob, 1998).

The acute positive reinforcing effects of drugs are critically important in establishing self-administration behavior, but the mechanisms underlying the transition from initial drug use to drug dependence are not clear. It has been hypothesized that the transition to drug dependence involves neuroadaptations within brain circuitries that produce positive reinforcement (Koob & Bloom, 1988). These neuroadaptations may contribute to a negative affective state upon drug termination. One mechanism of perpetuating drug dependence would be continued drug use to avoid a negative affective state through negative reinforcement processes (Koob, 1996). Accordingly, the perpetuation of nicotine dependence is hypothesized to be facilitated by the avoidance of certain withdrawal symptoms through further nicotine administration. Thus, investigation of the neurobiology of nicotine withdrawal may be critical to our understanding of the development and maintenance of nicotine dependence.

The present review will first focus on the neurobiology of acute nicotine reinforcement, followed by a discussion of alterations in systems that may modulate symptoms of nicotine withdrawal, and then present a theoretical model of the neurobiological mechanisms that may underlie acute nicotine withdrawal and vulnerability to relapse. The intent of this review is to provide a bridge between psychology and neuroscience by examining the neurobiological substrates for the behavioral phenomena associated with nicotine reinforcement and withdrawal within the context of neurobiological and behavioral theories postulated for addiction to other major drugs of abuse.

### Neurobiology of the acute rewarding effects of nicotine

Animal studies of the neurobiological bases of nicotine reinforcement using intravenous self-administration have yielded information about the neurochemical sys-

tems likely to be involved in mediating the acute positive reinforcing effects of nicotine. Nicotine activates nicotinic acetylcholine receptors in the mesocorticolimbic dopaminergic system that projects from the ventral tegmental area (VTA) to the nucleus accumbens and the prefrontal cortex (Corrigall, Coen, & Adamson, 1994; Corrigall, Franklin, Coen, & Clarke, 1992; Nisell, Nomikos, & Svensson, 1995; Pontieri, Tanka, Orzi, & Di Chiara, 1996). Non-dopamine neurochemical pathways also may modulate nicotine reinforcement processes. Nevertheless, the preponderance of data to date indicates that other neurochemical systems involved in nicotine reinforcement interact with the midbrain dopamine system. These systems include the cholinergic, glutamatergic, gamma-aminobutyric acid (GABA), and opioid peptide systems. Dopamine-independent positive reinforcing effects of nicotine remain to be demonstrated.

### Acetylcholine

Nicotine produces its central and peripheral actions by binding to the nicotinic acetylcholine receptor (nAChR) complex. Sixteen nAChR subunits have been identified based on molecular composition ( $\alpha 1$ – $\alpha 9$ ;  $\beta 1$ – $\beta 4$ ; Armeric, Sullivan, & Williams, 1995; Wonnacott, 1997) with the neuronal nicotinic subunits including  $\alpha 2$ – $\alpha 8$  and  $\beta 2$ – $\beta 4$ . It has been shown that all high affinity binding sites for nicotine include the  $\beta 2$  subunit (Picciotto *et al.*, 1995), and that nicotine-induced dopamine release is dependent on the  $\beta 2$  subunit (Picciotto *et al.*, 1998). For example, mutant mice lacking the  $\beta 2$  subunit will not self-administer nicotine (Picciotto *et al.*, 1998), indicating that the  $\beta 2$  subunit is critically involved in nicotine reinforcement. The most widely expressed subtypes of the nAChR in the brain contain  $\alpha 4$ ,  $\beta 2$ , or  $\alpha 7$  subunits (Flores, Rogers, Pabreza, Wolfe, & Kellar, 1992; Wada *et al.*, 1989; Zoli, Lena, Picciotto, & Changeux, 1998). Various nAChR  $\alpha$  and  $\beta$  subunit combinations, including the  $\alpha 4\beta 2$  subtype, are present throughout the mesolimbic pathway including the VTA, prefrontal cortex, amygdala, septal area, and nucleus accumbens (Marks *et al.*, 1992; Sargent, 1993; Wada *et al.*, 1989). These nAChRs provide potential binding sites through which nicotine may activate neurons within these structures to stimulate the release of several neurotransmitters.

Evidence suggests that cholinergic input to the mesolimbic dopamine pathway may provide a system through which nicotine may increase dopamine release. Administration of the non-competitive nAChR antagonist, mecamylamine, or the competitive nAChR antagonist, dihydro- $\beta$ -erythroidine (DH $\beta$ E) blocked nicotine self-administration in the rat, indicating that activation of nAChRs is involved in the reinforcing actions of nicotine (Corrigall & Coen, 1989; Corrigall *et al.*, 1994; Watkins, Epping-Jordan, Koob, & Markou, 1999). Further, immuno-cytochemical studies indicated that the VTA receives cholinergic innervation from the pedunculopontine nucleus, with nAChRs found in both

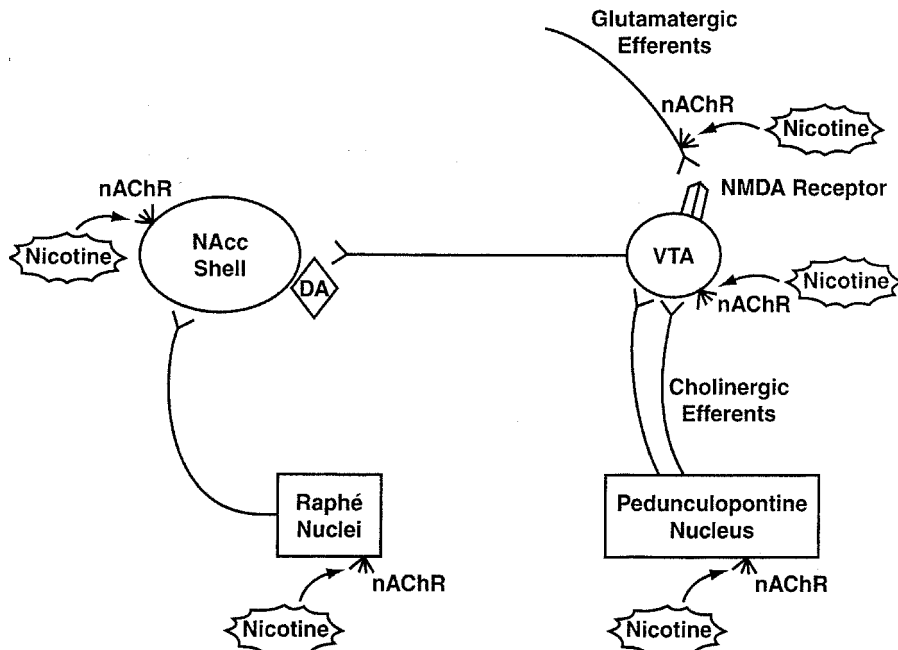

**Figure 1.** Schematic drawing of pathways partly mediating nicotine-induced positive reinforcement. Nicotine binding sites (nAChRs) are represented in the pedunculopontine nucleus, raphe nuclei, ventral tegmental area, and the nucleus accumbens. Depicted projections to the mesolimbic dopamine system include glutamatergic and GABAergic input, serotonergic afferents from the raphe nuclei, and cholinergic afferents from the pedunculopontine nucleus. Abbreviations: DA, dopamine; nAChR, nicotinic acetylcholine receptor; NMDA, *N*-methyl-D-aspartate; NAcc, nucleus accumbens; VTA, ventral tegmental area.

the VTA and the pedunculopontine nucleus (Bolam, Francis, & Henderson, 1991). Stimulation of cholinergic neurons within the pedunculopontine tegmental nucleus by exogenously administered nicotine leads to release of endogenous acetylcholine which excites dopamine neurons in the substantia nigra and VTA, and this activation is blocked by mecamylamine (Clarke, Hommer, Pert, & Skirboll, 1987). The finding that partial lesions of the pedunculopontine nucleus failed to block nicotine self-administration (Corrigall *et al.*, 1994) indicates that cholinergic input may not be required for the reinforcing actions of nicotine because exogenously administered nicotine may directly stimulate nAChRs within the VTA. Nevertheless, complete lesions of the pedunculopontine nucleus may be required to determine the functional role of the pedunculopontine nucleus to the VTA connection in acute nicotine reinforcement (Figure 1).

## Dopamine

Stimulation of dopamine systems appears to be of critical importance for the acute positive reinforcing properties of nicotine. Experimental evidence indicates that nicotine induces dopamine release partly by binding directly to nAChRs located within the mesolimbic system, specifically within the VTA (Nisell, Nomikos, & Svensson, 1994). In the rat brain, nAChRs have been identified on the cell bodies and dendrites of dopamine neurons in the ventral tegmental area, as well as their terminal fields in the nucleus accumbens (Clarke &

Pert, 1985; Schwartz, Lehmann, & Kellar, 1984; Swanson, Simmons, Whiting, & Lindstrom, 1987; Wada *et al.*, 1989). The presence of nAChRs throughout the dopamine neuron suggests that any of these sites could mediate the effect of nicotine on the mesolimbic dopamine system. It has been hypothesized, however, that nAChRs in the VTA play a more important role than those in the nucleus accumbens in mediating the effects of nicotine on dopamine release (Nisell *et al.*, 1994). Systemic administration of nicotine has been shown to produce a dose-dependent increase in extracellular dopamine levels in the shell of the nucleus accumbens, a neurochemical effect shared by other drugs that also serve as positive reinforcers (Nisell, Marcus, Nomikos, & Svensson, 1997; Pontieri *et al.*, 1996; Pontieri, Passarelli, Calo, & Caronti, 1998). Nevertheless, direct continuous infusion of nicotine in the VTA produced a longer lasting increase in dopamine release in the nucleus accumbens than nicotine infused into the nucleus accumbens (Nisell *et al.*, 1994). In addition, infusion of mecamylamine into the VTA blocked the systemically administered nicotine-induced dopamine release in the nucleus accumbens, while infusion of mecamylamine directly into the nucleus accumbens failed to block dopamine release (Nisell *et al.*, 1994). Further, nicotine-induced dopamine release from terminals in the nucleus accumbens is not affected by tetrodotoxin, a compound that prevents the generation of action potentials by blocking sodium channels (Giorguieff-Chesselet, Kemel, Wandscheer, & Glowinski, 1979; Rapiet, Lunt, &

Wonnacott, 1990) suggesting that nAChRs on dopamine terminals do not significantly contribute to nicotine-induced dopamine release (Benwell, Balfour, & Lucchi, 1993).

The role of nAChRs in the VTA in the positive reinforcing effects of nicotine is further suggested by the finding that infusions of the competitive nAChR antagonist dihydro- $\beta$ -erythroidine, directly into the VTA, but not the nucleus accumbens, produced a significant decrease in nicotine self-administration behavior (Corrigall *et al.*, 1994). Further, 6-hydroxydopamine lesions of the nucleus accumbens, or systemic administration of selective D1 (SCH23390) or D2 (spiperone) dopamine receptor antagonists attenuated nicotine self-administration (Corrigall & Coen, 1991; Corrigall *et al.*, 1992). Taken together, the results of the above neurochemical and behavioral studies offer support for the hypothesis that nicotine exerts its primary reinforcing action by activating dopamine neurons along the mesolimbic dopamine pathway.

In the context of nAChR activation and nicotine reinforcement, it is important to consider that nAChR activation in the VTA is followed by receptor desensitization (Pidoplichko, DeBiasi, Williams, & Dani, 1997). Receptor desensitization and recovery occurred at different rates, suggesting that within the VTA, there are multiple types of nAChRs with different activation and desensitization profiles (Pidoplichko *et al.*, 1997). Smokers report the first cigarette of the day as the most pleasurable (Russell, 1989), possibly because of nicotine-induced activation of recovered nAChRs in the VTA leading to greater dopamine release than later in the day. Throughout the day smokers maintain a steady blood nicotine level (Benowitz, 1996), and are exposed to nicotine concentrations which cause nAChR desensitization in the VTA (Pidoplichko *et al.*, 1997). If different nAChRs in the VTA have different sensitivities to nicotine, as suggested above, it may be that once a steady-state of nicotine is reached, periodic re-administration of nicotine engages nAChRs only activated by a high nicotine doses (Dani & Heinemann, 1996). Activation of these receptors would also cause dopamine release, thus contributing to the maintenance of cigarette smoking throughout waking hours. Nonetheless, the maintenance of smoking behavior in dependent organisms, despite the development of nAChR desensitization within the VTA, may indicate the involvement of parallel reward systems in the positive reinforcing actions of nicotine which extend beyond the mesolimbic dopamine pathway. Few, if any, studies to date have explored the neurobiology of the positive reinforcing actions of nicotine in dependent animals.

### Glutamate–dopamine interactions

Increasing evidence supports a role for excitatory amino acids in the effects of drugs of abuse (for a review, see Trujillo & Akil, 1995). Most relevant to the

present review are the indications of an excitatory role of *N*-methyl-D-aspartate (NMDA) receptors in the VTA on nicotine-induced increases in nucleus accumbens dopamine. Acute administration of nicotine activates nAChRs located pre-synaptically on glutamatergic terminals, leading to increased evoked glutamate release (Gray, Rajan, Radcliffe, Yakehiro, & Dani, 1996; McGehee, Heath, Gelber, Devay, & Role, 1995). In turn, through excitatory actions at NMDA receptors on VTA dopaminergic neurons, glutamate increases the burst firing of these neurons and subsequent dopamine release in the nucleus accumbens (Chergui *et al.*, 1993; Hu & White, 1996; Kalivas, Churchill, & Klitenick, 1993). Most importantly, blockade of NMDA receptors with 2-amino-5-phosphopentanoic acid injected directly into the VTA dose-dependently attenuated the nicotine-induced dopamine release in the nucleus accumbens (Schilstrom, Nomikos, Nisell, Hertel, & Svensson, 1998). Systemic administration of another NMDA antagonist, MK-801 (dizocilpine), also blocked nicotine-induced dopamine release in the nucleus accumbens (Sziraki, Sershen, Benuck, Hashim, & Lajtha, 1998). These data indicate that activation of excitatory nAChRs on glutamatergic terminals also may contribute to the acute reinforcing properties of nicotine.

### Gamma-aminobutyric acid (GABA)–dopamine interactions

GABAergic neurotransmission significantly modulates dopaminergic neurotransmission at the level of both the VTA and the nucleus accumbens (Churchill, Dilts, & Kalivas, 1992; Heimer, Zahm, Churchill, Kalivas, & Wahltmann, 1991; Kalivas *et al.*, 1993). There are GABAergic inhibitory afferents to dopaminergic ventral tegmental neurons (Walaas & Fonnum, 1980; Yim & Mogenson, 1980), inhibitory GABAergic interneurons within the VTA, and medium spiny GABAergic neurons in the nucleus accumbens that also inhibit mesolimbic dopamine release (Kalivas *et al.*, 1993). In addition, enhancement of GABAergic neurotransmission through administration of gamma-vinyl GABA (GVG), an indirect GABA agonist (an irreversible inhibitor of GABA transaminase), abolished nicotine-induced dopamine increases in the nucleus accumbens and the reinforcing effects of nicotine as reflected in the conditioned place preference paradigm (Dewey, Brodie, Gerasimov, Horan, Gardner, & Ashby, 1999). Taken together, these findings provide support for the hypothesis that GABAergic mechanisms may be involved in modulating nicotine reinforcement.

### Opioid peptide–dopamine interactions

Nicotine also affects the release of endogenous opioid peptides (Boyadjieva & Sarkar, 1997; Pomerleau & Pomerleau, 1984; Pomerleau & Rosecrans, 1989). Within the mesolimbic dopamine system, systemic

nicotine administration increases tissue levels of opioid peptides in the nucleus accumbens (Houdi, Pierzchala, Marson, Palkovits, & VanLoon, 1991; Pierzchala, Houdi, VanLoon, 1987). A high density of  $\mu$ -opioid receptors has been identified in the nucleus accumbens and it has been suggested that these receptors are occupied by endogenous opioid ligands released by nicotine (Davenport, Houdi, & VanLoon, 1990; Tempel & Zukin, 1987). Outside the mesolimbic dopamine system, nicotine stimulates nAChRs within the hypothalamus and induces the release of the pro-opiomelanocortin peptide group that includes the precursor to  $\beta$ -endorphin (Pomerleau, 1998). The  $\beta$ -endorphin system has been hypothesized to be involved in mood regulation, psychomotor stimulation, analgesia, reproduction, and temperature regulation (Cesselin, 1995; Terenius, 1992). Further, increased  $\beta$ -endorphin release is thought to decrease the response to stress, conserve energy, and facilitate relaxation (for reviews, see Cesselin, 1995; Henry, 1986; Herz, 1997; Terenius, 1992). It remains to be determined if activation of the hypothalamic  $\beta$ -endorphin system is involved in mediating the positive reinforcing effects of nicotine. Thus, the positive reinforcing properties of nicotine could be hypothesized to be modulated by activation of enkephalin neurons along parallel reward systems to the dopamine system (i.e., dopamine-independent systems) (Houdi *et al.*, 1991; Pomerleau & Pomerleau, 1984). Nevertheless, pharmacological studies in humans investigating the effects of naloxone, an opioid receptor antagonist on smoking behavior, have yielded inconsistent results (Karras & Kane, 1980; Nemeth-Coslett & Griffiths, 1986).

## Serotonin

Evidence for the involvement of the serotonergic system in the positive reinforcing effects of nicotine is limited. Various subtypes of high-affinity nicotinic acetylcholine receptors which are activated by a low dose of nicotine have been identified in both the median raphe nucleus and the hippocampus (Alkondon & Albuquerque, 1993; Benwell, Balfour, & Anderson, 1988; Li, Rainnie, McCarley, & Greene, 1998; Marks *et al.*, 1992). These receptors may provide a potential site of action for nicotine within the serotonergic system. Acute systemic administration of a high nicotine dose increased the release of serotonin in the frontal cortex of rats (Ribeiro, Bettiker, Bogdanov, & Wurtman, 1993); however, it is not known whether this effect is involved in the positive reinforcing effects of nicotine because this dose was significantly higher than that normally experienced by smokers. Subsequent studies using doses of nicotine that more closely approximate those of cigarette smokers provide little support for a role of the serotonin system in acute nicotine reinforcement. For example, administration of either ICS 205-930 or MDL 72222, two selective 5-HT<sub>3</sub> receptor antagonists, had no effect on intravenous nicotine self-administration in the rat (Corrigall & Coen,

1994). Furthermore, in a rat model of oral nicotine self-administration, administration of ipsapirone, a 5-HT<sub>1A</sub> agonist, had no effect on nicotine intake (Mosner, Kuhlman, Roehm, & Vogel, 1997). Nonetheless, neuroanatomical data suggest that both the VTA and the nucleus accumbens receive inputs from serotonergic neurons originating in the raphe nuclei (Steinbusch, 1981), thus providing a potential substrate for interactions between the serotonergic and dopaminergic systems. The functional role of serotonin in mediating the positive reinforcing or rewarding effects of nicotine is unclear and thus, further research is needed to explore this issue.

## The extended amygdala

### *Structures and connections*

It has been hypothesized that the reinforcing and withdrawal effects of various drugs of abuse may be modulated by neurochemical processes in specific basal forebrain areas that interface classical limbic structures with the extrapyramidal motor system (Koob, 1996; Koob *et al.*, 1993). Recent anatomical and functional analyses suggest that the reinforcing action of drugs may involve neuroanatomical substrates which extend beyond the pathway from the VTA to the nucleus accumbens (Alheid & Heimer, 1988; Koob *et al.*, 1993). The central nucleus of the amygdala, the bed nucleus of the stria terminalis, and a transition area in the posterior part of the shell of the nucleus accumbens are components of a large forebrain structure termed the 'extended amygdala' (de Olmos *et al.*, 1985; Heimer, Alheid, & Zabaorszky, 1985; Heimer & Alheid, 1991). The anatomical concept of the extended amygdala is based upon observations that the components of these brain regions have similar cell morphology, immunohistochemistry, and common afferent and efferent projections (Heimer & Alheid, 1991). Components of the extended amygdala receive afferent connections from limbic areas, the hippocampus, basolateral amygdala, midbrain, and lateral hypothalamus. The efferent connections include the ventral pallidum, VTA, and projections to the brainstem and lateral hypothalamus (Heimer & Alheid, 1991). These projections to and from the extended amygdala provide the necessary connections to modulate drug reward as well as neuroadaptive changes proposed to occur with chronic drug exposure (Koob, Sanna, & Bloom, 1998; Figure 2).

### *The extended amygdala and reinforcement*

While little is known about the role of the extended amygdala in nicotine reinforcement, several studies have investigated the role of these structures in reinforcement associated with another psychomotor stimulant drug, cocaine. Lesions of dopamine neurons in the VTA or nucleus accumbens or administration of dopamine recep-

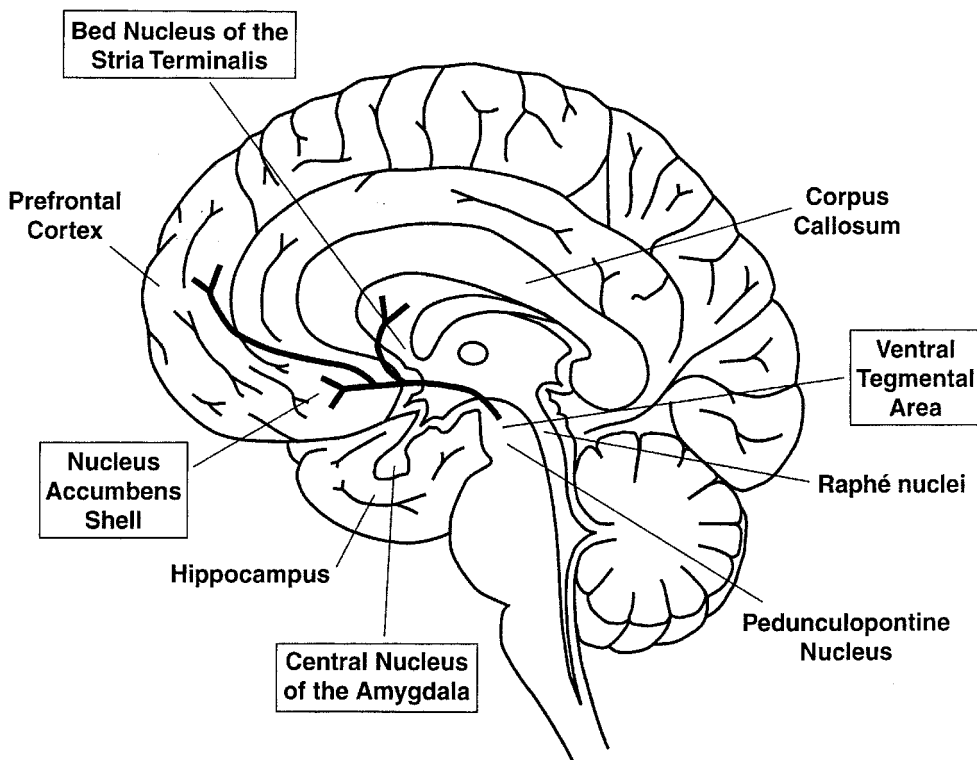

**Figure 2.** Schematic drawing of a midsagittal view of the human brain. Boxed terms indicate the components of the extended amygdala (shell of the nucleus accumbens, bed nucleus of the stria terminalis, central nucleus of the amygdala). Darkened lines indicate the mesolimbic dopamine projection from the ventral tegmental area to the nucleus accumbens and prefrontal cortex.

tor antagonists into areas associated with the extended amygdala, such as the shell of the nucleus accumbens, the central nucleus of the amygdala, or the bed nucleus of the stria terminalis, decreased the reinforcing efficacy of self-administered cocaine (Caine, Heinrichs, Coffin, & Koob, 1995; Caine & Koob, 1994; Epping-Jordan, Markou, & Koob, 1998a; Roberts & Koob, 1982; Roberts, Koob, Klonoff, & Fibiger, 1980). Like cocaine, nicotine may exert similar effects on specific components of the extended amygdala. Nicotinic acetylcholine receptor genes have been located in neurons throughout the rat amygdala, including the central nucleus of the amygdala (Wada *et al.*, 1989), indicating potential functional nAChRs within these areas. Further, activation of the immediate early gene *c-fos*, a marker of neuronal activation, and decreased dopamine release have been measured in the central nucleus of the amygdala during precipitated nicotine withdrawal (Panagis *et al.*, 1998), suggesting that alterations occur within the extended amygdala during chronic nicotine exposure. Taken together, the ability of both cocaine and nicotine to increase dopamine release specifically in the shell and not the core of the nucleus accumbens (Nisell *et al.*, 1994; Pontieri *et al.*, 1996), and the expression of nicotinic receptor genes in the central nucleus of the amygdala (Wada *et al.*, 1989) leave open the possibility of a potential role of the extended amygdala in the reinforcing effects of nicotine.

### Nicotine withdrawal: theoretical framework for neurochemical adaptations

Solomon and Corbit (1974) elaborated on an opponent process theory of motivation wherein affective, emotional, or hedonic states are neutralized by changes within brain systems that modulate these emotional processes. It is hypothesized that specific brain systems are automatically recruited whenever significant departures from normal affect occur as a consequence of stimulation, and act to decrease the intensity of the subjective experience. The opponent process is hypothesized to be indirectly activated by stimulation of positive affective or positive hedonic states and acts to oppose the initial effect (Solomon & Corbit, 1974). Application of this theory to the development of drug dependence may involve postulated changes in neurochemical systems that oppose the initial reinforcing effects of a drug leading to a dependent state. Specifically, the same neuronal substrates involved in the acute, positive reinforcing properties of a drug are hypothesized to be compromised during chronic exposure as well as recruitment of neuronal substrates not involved in the acute reinforcing effects of drugs. These alterations are hypothesized to contribute to the negative motivational and affective states during withdrawal (Koob & Bloom, 1988; Koob & LeMoal, 1997).

## Nicotine withdrawal phenomena

The nicotine withdrawal syndrome in both human and non-human animals includes somatic and affective symptomatology (see introduction). The somatic syndrome associated with nicotine withdrawal has been modeled in rats (Epping-Jordan *et al.*, 1998b; Hildebrand *et al.*, 1997; Malin *et al.*, 1992; 1993; 1994; Watkins *et al.*, 2000), but overt somatic withdrawal signs may not reflect the affective or motivational state of the animal. Affective changes are difficult to assess in animals; nevertheless, intracranial self-stimulation has been shown to be a valid and reliable measure of changes in reward associated with acute drug exposure (Baldo, Jain, Veraldi, Koob, & Markou, 1999; Bauco & Wise, 1994; Huston-Lyons & Kornetsky, 1992; Kornetsky & Esposito, 1981; Moolten & Kornetsky, 1990; Stellar & Rice, 1989) and withdrawal from several drugs of abuse, including cocaine, amphetamine, morphine, ethanol, and most recently, nicotine (Epping-Jordan *et al.*, 1998b; Leith & Barrett, 1976; Lin, Koob, & Markou, 1999; Markou & Koob, 1991; Schulteis, Markou, Cole, & Koob, 1995; Schulteis, Markou, Gold, Stinus, & Koob, 1994). Another common effect of withdrawal from many drugs of abuse is reduced dopamine output in the nucleus accumbens (Rossetti, Hmaidan, & Gessa, 1992). In studies employing *in vivo* microdialysis, extracellular dopamine levels in the nucleus accumbens decreased 30–40% during spontaneous cocaine withdrawal (Weiss, Markou, Lorang, & Koob, 1992), approximately 50% during spontaneous morphine withdrawal (Crippens & Robinson, 1994), 25% during precipitated morphine withdrawal (Spanagel, Almeida, Bartl, & Shippenberg, 1994), and 64% during spontaneous ethanol withdrawal (Weiss *et al.*, 1996). Recently, a decrease of 25% in extracellular dopamine levels in the nucleus accumbens was measured during mecamylamine-precipitated nicotine withdrawal in rats chronically exposed to nicotine (Hildebrand, Panagis, Svensson, & Nomikos, 1999). Microdialysis measures of dopamine levels during spontaneous nicotine withdrawal have not been reported, although tissue levels of dopamine in the nucleus accumbens were reduced approximately 32% compared to saline controls (Fung, Schmid, Anderson, & Lau, 1996).

## Molecular adaptations during chronic nicotine exposure

The effects of nicotine on central nAChRs are complex and have been described as ‘paradoxical’ in that chronic nicotine exposure leads to receptor desensitization and inactivation which is followed by an upregulation in nicotinic receptors (Bhat, Marks, & Collins, 1994; Marks *et al.*, 1992; Wonnacott, 1990). Acute administration of nicotine stimulates the nAChR which leads to a brief opening of the ion channel (receptor activation), but then transiently becomes unresponsive to further exposure to

agonists (receptor inactivation and desensitization; Corringer, Bertrand, Bohler, Edelstein, Changeux, & Bertrand, 1998). Consequently, chronic exposure to nicotine leads to an increase in the number of nAChRs (receptor upregulation; Collins, Bhat, Pauly, & Marks, 1990; Perry, Davila-Garcia, Stockmeier, & Kellar, 1999; Wonnacott, 1990). Even though this nicotinic receptor activation, desensitization, and upregulation can be viewed as a neuronal response to maintain the baseline level of synaptic activity within cholinergic and other neurotransmitter systems during chronic nicotine exposure (Dani & Heinemann, 1996; Reitstetter, Lukas, & Gruener, 1999), it is not clear if upregulation reflects an increase in functional receptors (Wonnacott, 1997). Moreover, nAChRs may exist in many different functional states within the brain (Changeux, Devillers-Thiery, & Chemouilli, 1984; Reitstetter *et al.*, 1999), thus maximizing function. The  $\alpha 2$ ,  $\alpha 4$ , and  $\alpha 7$  subunits become inactive and desensitized in the chronic presence of nicotine, while the  $\alpha 3$  and  $\alpha 6$  subunits do not show inactivation (Olale, Gerzanich, Kuryatov, Wang, & Lindstrom, 1997), suggesting that some subunits show a greater sensitivity to nicotine than others. Injection of  $\alpha 3\beta 2$  or  $\alpha 4\beta 2$  subunit RNAs in oocytes followed by subsequent nicotine administration indicated that  $\alpha 4\beta 2$  nicotinic receptors desensitize more quickly and recover more slowly than  $\alpha 3\beta 2$  receptors (Hsu, Amin, Weiss, & Wecker, 1996). Thus, a differential effect of chronic nicotine exposure on release of various neurotransmitter systems may be explained by the balance of receptor density, desensitization, and functionality.

During nicotine abstinence, such changes in nAChR function may mediate some of the negative affective states and somatic symptoms associated with nicotine withdrawal. For example, during nicotine abstinence that leads to decreased plasma nicotine levels, the previously desensitized or inactive nAChRs may begin to recover to functional states at different rates depending on the brain region or receptor subtype. During chronic nicotine exposure, upregulation of nAChRs also may occur along non-reward-related cholinergic pathways such that during abstinence, the recovery of nAChRs in reward and non-reward circuits may contribute to negative affective or somatic withdrawal symptoms (Dani & Heinemann, 1996). Thus, the development and perpetuation of nicotine addiction may involve self-medication to effectively control the number of functional nAChRs along pathways affected by nicotine (Dani & Heinemann, 1996; Koob *et al.*, 1998).

## Neurochemical adaptations

### Dopamine

Recent evidence supports the hypothesis that neuroadaptations in the dopaminergic system occur with chronic nicotine exposure. For example, after chronic exposure to nicotine, decreases in extracellular dopamine

levels in the nucleus accumbens and the central nucleus of the amygdala have been measured during mecamylamine-precipitated nicotine withdrawal (Hildebrand, Nomikos, Hertel, Schilstrom, & Svensson, 1998; Hildebrand *et al.*, 1999; Panagis *et al.*, 1998). Further, during spontaneous nicotine withdrawal, decreased tissue levels of dopamine in the nucleus accumbens have been reported (Fung *et al.*, 1996).

A possible explanation for the reduction in dopamine release during chronic nicotine exposure involves putative nicotinic receptor desensitization leading to decreased neuronal firing.

Decreased neuronal firing in the VTA has been reported during continuous chronic nicotine infusion (6 mg/kg/day, nicotine base, for 12 days; Rasmussen & Czachura, 1995). During spontaneous nicotine withdrawal, neuronal firing in the VTA returned to baseline levels 2 days after termination of chronic nicotine, while the firing of substantia nigra neurons, unaffected during chronic nicotine exposure, increased over baseline levels on days 2, 3, and 4 after termination of chronic nicotine (Rasmussen & Czachura, 1995). The differing effects of chronic nicotine and withdrawal on the firing rate of VTA and substantia nigra neurons may indicate distinct nAChR subtypes in these brain regions. It also has been reported that after chronic nicotine infusion (4 mg/kg/day, nicotine base, for 7 days), a subsequent acute nicotine challenge potentiated the increase in nicotine-induced dopamine release compared to the increase measured after an acute nicotine challenge without previous nicotine exposure (Marshall, Redfern, & Wonacott, 1997). The acute challenge, however, was given approximately 20 h after termination of chronic nicotine exposure, potentially allowing the recovery of desensitized nAChRs. Taken together, these findings indicate that alterations within dopaminergic systems occur during chronic nicotine exposure. Nevertheless, the putative role of nAChR desensitization remains to be determined.

Further evidence indicates that intracranial self-stimulation reward thresholds are elevated in rats during spontaneous or precipitated nicotine withdrawal (Epping-Jordan *et al.*, 1998b; Watkins *et al.*, 2000). This alteration in brain reward function also may reflect alterations in dopaminergic systems. Brain stimulation reward has been shown to depend on continued activation of pedunculopontine cholinergic neurons that terminate on dopamine neurons in the VTA (Yeomans & Baptista, 1997; Yeomans, Mathur, & Tampakeras, 1993). It has been proposed that myelinated axons of the medial forebrain bundle (an area supporting high rates of self-stimulation behavior) projecting from the lateral hypothalamus to the pedunculopontine nucleus activate cholinergic neurons which then activate dopamine neurons in the VTA by stimulating both nicotinic and muscarinic receptors (Yeomans & Baptista, 1997). It may be that after nAChR desensitization and upregulation in the absence of sufficient agonist to stimulate the receptors, there is reduced cholinergic activation of

dopamine neurons. Thus, a reduction in cholinergic input to dopamine neurons along the reward pathway may result in decreased brain reward function. Nevertheless, these proposed neuroadaptations involving dopamine may only partly contribute to nicotine withdrawal symptomatology. Alterations in glutamatergic, GABAergic, opioid peptide and serotonin systems also may contribute to the negative affective aspects of nicotine withdrawal.

#### *Glutamate–dopamine interactions*

Recent evidence indicates a role of a subset of glutamatergic receptors in the increases in the acoustic startle response, a measure of reactivity to environmental stimuli, associated with nicotine withdrawal (Helton, Tizzano, Monn, Schoepp, & Kallman, 1997; Wiley, 1998). Metabotropic glutamate receptors include Group I, II, and III receptor families, which modulate synaptic function through second messenger systems (Pin & Duvoisin, 1995). Group II receptors are most likely pre-synaptic, based on the finding that activation of these receptors leads to decreased glutamatergic neurotransmission in limbic areas, such as the hippocampus and the amygdala (Battaglia, Bruno, Ngomba, Di Grezia, Copani, & Nicoletti, 1998; Pin & Duvoisin, 1995). The pre-synaptic Group II metabotropic glutamate receptor agonist LY354740 completely blocked the increased startle response induced by nicotine withdrawal (Helton *et al.*, 1997). This attenuation of a nicotine-withdrawal symptom is presumably mediated by reversing an over-excitation of the glutamatergic system resulting from chronic nicotine administration. This hypothesis is supported by evidence indicating the Group II metabotropic glutamate receptor agonist DCG-IV protected against glutamate over-excitation (Bruno *et al.*, 1995; Buisson, Yu, & Choi, 1996; Miyamoto, Ishida, & Shinozaki, 1997). Taken together, these findings indicate that glutamate systems are involved in neuroadaptations to chronic nicotine exposure. Nevertheless, the above results may not accurately predict what the effects of the same glutamate receptor agonist would be on other measures of nicotine withdrawal, such as threshold elevations. If decreased mesolimbic dopamine neurotransmission during nicotine withdrawal (Hildebrand *et al.*, 1998, 1999; Panagis *et al.*, 1998) partly mediates the threshold elevations associated with withdrawal (Epping-Jordan *et al.*, 1998b), and glutamate positively modulates mesolimbic dopaminergic neurotransmission in the VTA and nucleus accumbens, then it would be predicted that decreased glutamatergic neurotransmission would exacerbate rather than reverse nicotine withdrawal symptoms.

There is also evidence that glutamate is involved in some behavioral changes and neuroadaptations occurring with chronic nicotine administration, although these phenomena may not be directly related to withdrawal symptomatology. Examples of neuroadaptations to chronic nicotine exposure include the development of



sensitization and tolerance to nicotine. Sensitization to a drug has been defined as a long-lasting increment in response occurring upon repeated presentation of a stimulus (Segal & Mandell, 1974). In rats, locomotor activity has been used as a behavioral measure of sensitization to nicotine. In nicotine-naïve rats, acute administration of nicotine decreased exploratory locomotor activity, whereas repeated administration of nicotine produced a rapid tolerance to the locomotor-depressant effects, followed by an increase in locomotor activity (Clarke & Kumar, 1983; Stolerman, Bunker, & Jarvik, 1974; Stolerman, Fink, & Jarvik, 1973). Moreover, sensitization to the locomotor activating effects of nicotine develops after repeated administration (Clarke & Kumar, 1983; Benwell & Balfour, 1992). Co-administration of NMDA receptor antagonists, such as the non-competitive antagonist MK-801 (dizocilpine) or the competitive antagonist D-CPPene, with nicotine reduced the development of tolerance to the locomotor depressant effect of nicotine, attenuated the development of tolerance to the aversive stimulus effects of nicotine as measured by conditioned taste aversion, and prevented sensitization to the locomotor activating effects of nicotine (Shoaib, Benwell, Akbar, Stolerman, & Balfour, 1994; Shoaib, Schindler, Goldberg, & Pauly, 1997; Shoaib & Stolerman, 1996). Furthermore, pretreatment with the non-competitive NMDA receptor antagonist MK-801 reduced nicotinic receptor upregulation during chronic exposure suggesting a neuroadaptation that may account for the lack of development of the behavioral adaptations (Shoaib *et al.*, 1997).

#### *Gamma-aminobutyric acid (GABA)–dopamine interactions*

Although there is some evidence for the role of GABA neurotransmission in the acute neurochemical and behavioral effects of nicotine (see above), there is little evidence indicating a potential role of GABAergic neurotransmission in nicotine withdrawal. Based on the finding that activation of GABA receptors in the VTA has an inhibitory effect on mesolimbic dopamine neurotransmission, it may be hypothesized that enhancement of GABAergic neurotransmission during nicotine withdrawal may facilitate withdrawal symptoms.

#### *Opioid peptides*

Another proposed neuroadaptation to chronic nicotine administration involves opioid peptide systems. Recent examination of the nicotine withdrawal syndrome in rats suggests that opioid systems may play a role in nicotine dependence, although the findings are inconsistent. In rats, the somatic signs of nicotine withdrawal resemble those seen in opiate withdrawal, including the symptoms of abdominal constrictions, facial fasciculation, and ptosis. This syndrome has been observed after spontaneous nicotine withdrawal, as well as withdrawal precipitated by the nicotinic acetylcholine receptor

antagonists mecamylamine or chlorisondamine (Epping-Jordan *et al.*, 1998b; Hildebrand *et al.*, 1997, Malin *et al.*, 1992, 1993, 1994; Watkins *et al.*, 2000) and dihydro- $\beta$ -erythroidine (Malin, Lake, Upchurch, Sheno, Rajan, & Schweinle, 1998; however, see Epping-Jordan *et al.*, 1998b). Interestingly, the somatic signs of nicotine withdrawal also have been precipitated by the opiate antagonist naloxone in nicotine-dependent rats (Malin *et al.*, 1993; however, see Watkins *et al.*, 2000), or dansyl-RFamide, an analog of neuropeptide FF, an anti-opiate peptide (Malin *et al.*, 1996). Moreover, acute injections of morphine, an opiate agonist, reversed the somatic signs of nicotine withdrawal (Malin *et al.*, 1993). A recent study has failed to replicate these findings and indicated that doses of naloxone as high as 8 mg/kg did not induce a differential number of somatic signs of nicotine withdrawal or threshold elevations in nicotine-dependent and control subjects (Watkins *et al.*, 2000). The reason for this discrepancy is unclear at this point. Nevertheless, administration of a low naloxone dose (0.12 mg/kg), but not low nAChR antagonist doses, induced conditioned place aversions in nicotine-treated rats suggesting that conditioned place aversions are mediated by reduced opioid neurotransmission, and not reduced cholinergic neurotransmission (Watkins *et al.*, 2000). Human studies of the effects of naloxone on smoking behavior have yielded inconsistent results (Karras & Kane, 1980; Nemeth-Coslett & Griffiths, 1986). In terms of withdrawal in humans, administration of naloxone to nicotine-dependent humans produced dose-dependent increases in self-reported affective and somatic signs of nicotine withdrawal, suggesting that long-term exposure to nicotine is associated with alterations in endogenous opioid peptide systems (Krishnan-Sarin, Rosen, & O'Malley, 1999). Thus, it may be hypothesized that during chronic nicotine exposure there is a release of opioid peptides (Boyadjieva & Sarkar, 1997; Pomerleau & Pomerleau, 1984; Pomerleau & Rosecrans, 1989) which leads to a downregulation of  $\mu$ -opioid receptors or opioid receptor transduction mechanisms. During nicotine abstinence (i.e., in the absence of an agonist), this downregulation of  $\mu$ -opioid receptors or opioid receptor transduction mechanisms may contribute to some, but not all, aspects of nicotine withdrawal.

#### *Serotonin (5-HT<sub>1A</sub>) receptor function*

As discussed above, the acute effects of nicotine on the serotonin system are unclear. Nevertheless, evidence suggests a role of altered serotonin neurotransmission in nicotine withdrawal. Chronic nicotine treatment produced a selective decrease in the concentration of 5-HT in the hippocampus (Benwell & Balfour, 1979), providing evidence for a neuroadaptation to nicotine. The site of action for these alterations in serotonin processes may include the median raphe nucleus, the hippocampus, and potentially the amygdala. Increases in the number of hippocampal 5-HT<sub>1A</sub> receptors have been measured in

chronic smokers. This receptor upregulation may reflect a reduction in the activity of serotonergic neurons within the median raphe nucleus which innervates the hippocampus, the amygdala and several other forebrain structures (Benwell, Balfour, & Anderson, 1990). The behavioral or affective consequences of this neuroadaptation are unclear, but considering the findings that serotonin deficits have been implicated in depression and anxiety (Coppin, 1967; Delgado, Charney, Price, Aghajanian, Landis, & Heninger, 1990; Delgado *et al.*, 1991; Markou *et al.*, 1998; Young, Smith, Pihl, & Ervin, 1985), it may be hypothesized that during chronic nicotine exposure and nicotine withdrawal, the decreases in serotonin function play a role in the onset of negative affective symptoms, such as depressed mood, impulsivity and irritability.

A hypothesized mechanism of action for the nicotinic-serotonergic interaction begins with nicotine stimulating nAChRs located in the somatodendritic region in the median raphe nucleus and the terminal fields in the forebrain to facilitate serotonin release. The released serotonin would then stimulate post-synaptic 5-HT<sub>1A</sub> receptors located throughout the hippocampus, amygdala, and other sites to modulate some of its positive effects on mood. With chronic nicotine treatment, the nicotinic receptor desensitization would lead to an upregulation in both pre-synaptic nicotinic and post-synaptic 5-HT<sub>1A</sub> receptors to maintain baseline functional activity within the terminal regions. During nicotine abstinence, as the previously desensitized nicotinic receptors begin to recover to the pre-nicotine functional state, the absence of nicotine to stimulate these receptors combined with the upregulated post-synaptic 5-HT<sub>1A</sub> serotonergic receptors may be hypothesized to contribute to decreased serotonergic function leading to the depressed mood often reported during nicotine withdrawal (Hughes *et al.*, 1991). An additional hypothesis involves an effect of nicotine on 5-HT<sub>1A</sub> raphe autoreceptors.

Other brain sites where alterations in serotonin function could modulate the depressed mood associated with nicotine withdrawal include serotonin projections to the hypothalamus. The hypothalamus also contains post-synaptic 5-HT<sub>1A</sub> receptors, as well as nAChRs located on pre-synaptic 5-HT terminals (Schwartz *et al.*, 1984). The lateral hypothalamus has significant projections to and from components of the extended amygdala (Heimer *et al.*, 1991; Usuda, Tanaka, & Chiba, 1998). Thus, alterations in serotonin function within the hypothalamus could also be hypothesized to modulate some of the changes in reward processes measured by intracranial self-stimulation of the lateral hypothalamus.

A different type of alteration in serotonin function may underlie the increased reactivity to environmental stimuli observed during nicotine withdrawal. Increased startle reactivity has been measured in rats during nicotine withdrawal (Helton, Modlin, Tizzano, & Rasmussen, 1993; Rasmussen, Czachura, Kallman, & Helton, 1996). In rats withdrawing from nicotine, pre-

treatment with the 5-HT<sub>1A</sub> antagonists NAN-190, LY206130, or WAY-100635 significantly reduced the withdrawal-induced increase in the startle response (Rasmussen, Kallman, & Helton, 1997). The exact mechanism and site of action for this reduction in startle reactivity is unknown. Nevertheless, it is hypothesized that the increased startle response observed during nicotine withdrawal is due to a decrease in the availability of synaptic serotonin because serotonin has an inhibitory influence on startle (Geyer, Peterson, & Rose, 1980; Geyer, Puerto, Menkes, Segal, & Mandell, 1976). Antagonism of 5-HT<sub>1A</sub> autoreceptors in the raphe nuclei then would lead to an increase in serotonin release, effectively attenuating nicotine withdrawal, reflected in decreased startle reactivity. Interestingly, however, administration of p-MPPI, a 5-HT<sub>1A</sub> receptor antagonist, did not reverse either threshold elevations or the somatic signs of nicotine withdrawal (Harrison *et al.*, 1999). These results, taken together, indicate that different symptoms of nicotine withdrawal may be mediated by different neurobiological alterations within the serotonergic system.

#### *Corticotropin-releasing factor (CRF)*

Alterations in brain stress systems also may contribute to the negative affective symptoms associated with nicotine withdrawal. Specifically, overactivity of the stress hormone corticotropin-releasing factor (CRF) may underlie the symptoms of anxiety, increased stress, and irritability often reported by abstinent smokers. The hypothesis that CRF is activated during nicotine withdrawal is based on the observation that acute withdrawal from nicotine can produce an increase in circulating corticosterone (Benwell & Balfour, 1979) and that CRF has been shown to be increased during withdrawal from chronic administration of other major drugs of abuse, including cocaine, ethanol, and cannabinoids (Baldwin, Rassnick, Rivier, Koob, & Britton, 1991; Rodriguez de Fonseca, Carrera, Navarro, Koob, & Weiss, 1997; Sarnyai, Biro, Gardi, Vecsernyes, Julesz, & Telegdy., 1995).

#### **Nicotine and depression**

During the last 20 years, an association has been observed between withdrawal from smoking and negative affect, including anxiety, frustration, anger, and depressed mood (Pomerleau, Adkins, & Pertschuk, 1978; Waal-Manning & de Hamel, 1978). The relationship between depressed mood and smoking is suggested by estimates indicating that up to 60% of smokers have a history of clinical depression (Glassman, Stetner, & Walsh, 1988; Hughes, Hatsukami, Mitchell, & Dahlgren, 1986). Epidemiological results from a sample of 3213 respondents demonstrated that the incidence of Major Depressive Disorder among smokers was twice that of non-smokers (Glassman *et al.*, 1990). Moreover, smokers who had a history of clinical depression were half as

likely to succeed in quitting smoking than smokers without depressive histories (14% versus 28%) (Glassman *et al.*, 1990). Prospective studies also showed that non-smokers scoring high on a depression inventory were more likely to be smokers 14 months later than individuals who scored low on this inventory (Breslau, Kilbey, & Andreski, 1993). From most of the studies reviewed above, it is unclear whether individuals who suffer from depressive symptomatology are more likely to initiate smoking or whether depressive symptoms are induced or exacerbated by long-term smoking (Markou *et al.*, 1998). As discussed above, nicotine has been hypothesized to produce an initial increase in serotonergic function, an effect that may be particularly reinforcing for individuals who suffer from chronically low levels of serotonin contributing to depressed mood. This effect on serotonin, however, is transient and nicotine's antidepressant actions may involve the recruitment of other neurochemical systems to alleviate depression, such as suppression of corticotropin-releasing factor, increased opioid activity, or increased dopaminergic function. Whatever the mechanism for the antidepressant actions of nicotine, smokers who report 'negative affect' as a reason for smoking are likely to fail at smoking cessation (Pomerleau *et al.*, 1978).

Recognition of the role of negative affect in smoking behavior has led to the use of antidepressant drugs to aid in smoking cessation programs. Early studies with the tricyclic antidepressant doxepin, which inhibits the reuptake of serotonin, norepinephrine, and to a lesser extent, dopamine (Stahl, 1997), showed promise as an aid to smoking cessation (Edwards, Murphy, Downs, Ackerman, & Rosenthal, 1989), but no further studies on doxepin have been reported. Investigation of another tricyclic antidepressant, nortriptyline, as an adjunct to smoking cessation indicated some effectiveness in promoting cessation. Results from a double-blind, placebo-controlled study showed that 14% of patients who received 75 mg of nortriptyline per day for 2 months were still abstinent after 6 months (Prochazka, Weaver, Keller, Fryer, Licari, & Lofaso, 1998). Self-reported withdrawal symptoms including irritability, anxiety, and difficulty concentrating were significantly reduced by day 8 of treatment in patients who received nortriptyline compared to placebo (Prochazka *et al.*, 1998). Interestingly, selective serotonin reuptake inhibitors appear not to affect smoking behavior in heavy smokers (Sellers, Naranjo, & Kadlec, 1987), suggesting that serotonin is probably only one of several neurotransmitters involved in nicotine dependence. Most recently, the effects of a sustained-release form of bupropion on smoking cessation have been investigated. Bupropion is a weak inhibitor of norepinephrine and dopamine uptake but does not affect serotonin reuptake (Ascher *et al.*, 1995). Results from two double-blind, placebo-controlled studies indicated that 23–30% of subjects who received 300 mg of bupropion per day for approximately 2 months were still abstinent after 1 year, values almost twice that of

subjects receiving placebo (Hurt *et al.*, 1997; Jorenby *et al.*, 1999). Thus, preliminary results from clinical trials using antidepressants as an adjunct to smoking cessation suggest that dopamine and norepinephrine function, perhaps more so than serotonin, modulate some of the negative affective changes associated with nicotine withdrawal.

### Nicotine and schizophrenia

Schizophrenia presents another promising area of research into the complex action of nicotinic receptor function in affective abnormalities seen in psychiatric populations. Patients with schizophrenia have the highest incidence of smoking, with some estimates exceeding 90%, compared to 25% of the general population (Glassman, 1993; Hughes *et al.*, 1986). Individuals with schizophrenia commonly smoke high-tar cigarettes and extract more nicotine from cigarettes than smokers without schizophrenia (Hughes *et al.*, 1986; Olincy, Young, & Freedman, 1997). The high rate of cigarette smoking among schizophrenia patients has been suggested to reflect an attempt to reduce neuroleptic-induced side-effects (Jarvik, 1991). Results from studies on smoking and the side-effects of antipsychotics have been mixed, with a few reports of diminished neuroleptic-induced dyskinesias among schizophrenia patients who smoke (Decina, Caracci, Sandik, Berman, Mukherjee, & Scapicchio, 1990; Goff, Henderson, & Amico, 1992; Sandyk, 1993), with other reports of increased tardive dyskinesia among smokers (Wirshing, Engle, Levin, Cummings, & Rose, 1989; Yassa, Lal, Korpassy, & Ally, 1987), and still other findings indicating no difference between smokers and non-smokers (Menza, Grossman, Van Horn, Cody, & Forman, 1991). From anecdotal reports, only a small percentage of schizophrenia patients report smoking to reduce the side-effects of antipsychotic medications (Dalack & Meador-Woodruff, 1996).

Another hypothesis involves the negative symptoms of schizophrenia, symptoms which include anhedonia (i.e., diminished interest or pleasure), avolition (i.e., lack of motivation), and affective flattening (American Psychiatric Association, 1994). It may be hypothesized that schizophrenia patients attempt to self-medicate their negative symptoms by smoking, symptoms which tend to be most resistant to currently available antipsychotic treatments (Jibson & Tandon, 1998; Krystal, D'Souza, Madonick, & Petrakis, 1999; Marder, Wirshing, & Van Putten, 1991; Moller, 1998; Wirshing *et al.*, 1989). As noted above, nicotine increases burst firing of dopamine neurons along the mesocorticolimbic pathway resulting in a net increase in extracellular dopamine in both the nucleus accumbens and the prefrontal cortex (Grenhoff, Aston-Jones, & Svensson, 1986; Nisell *et al.*, 1995; Pich, Pagliusi, Tessari, Talabot-Ayer, Hooft van Huijsduijnen, & Chiamulera, 1997; Svensson, Grenhoff, & Engberg, 1990). Schizophrenia patients exhibit a reduction in

metabolic activity in the prefrontal cortex, known as hypofrontality, which has been hypothesized to be associated with the negative symptoms of schizophrenia (Weinberger, Berman, & Ilowsky, 1988). The increased dopamine release in the prefrontal cortex may be hypothesized to lead to a reduction in the negative symptoms of schizophrenia and as such, the high incidence of smoking among schizophrenia patients may reflect an attempt at self-medication (Markou *et al.*, 1998; Svensson *et al.*, 1990).

Deficits in inhibitory mechanisms which regulate the processing of sensory information are also characteristic of patients with schizophrenia. Individuals with schizophrenia exhibit disrupted prepulse inhibition of the acoustic startle reflex that reflects a sensorimotor gating deficit (Geyer & Braff, 1987). Such sensory gating deficits may be reversed by nicotine administration through tobacco smoking. It has been shown that acute or chronic administration of nicotine improves prepulse inhibition of the acoustic startle response under baseline conditions in rats (Acri, Brown, Saah, & Grunberg, 1995; Curzon, Kim, & Decker, 1994). Further, animal models of the sensorimotor gating response indicate that alterations in dopamine neurotransmission may modulate sensory processing deficits (Swerdlow, Braff, & Geyer, 1990; Swerdlow, Braff, Geyer, & Koob, 1986; Swerdlow, Caine, & Geyer, 1992; Swerdlow & Geyer, 1993). In rats, depletion of dopamine in the prefrontal cortex or the nucleus accumbens reduced prepulse inhibition of the acoustic startle response, an effect similar to the sensorimotor gating deficit seen in patients with schizophrenia (Bubser & Koch, 1994; Geyer & Braff, 1987; Swerdlow & Geyer, 1998). While the above studies suggest that a reduction in dopamine mediates some alterations in sensorimotor gating, evidence indicates that alterations in nicotinic receptor function also may contribute to sensory gating deficits (see below).

Another measure of sensory gating is the P50 or N40 auditory event-related potential in humans and rats, respectively (Freedman, Adler, Myles-Worsley, Nagamoto, Miller, Kisley, McRae, Cawthra, & Waldo, 1996). Rats raised in social isolation showed abnormal sensory gating, as reflected in both prepulse inhibition and N40 event-related potentials, similar to deficits exhibited by patients with schizophrenia (Geyer, Wilkinson, Humby, & Robbins, 1993; Stevens, Johnson, & Rose, 1997). The abnormal N40 auditory gating in socially isolated rats was temporarily reversed by acute administration of nicotine (Stevens *et al.*, 1997), suggesting that activation of nAChRs by nicotine transiently normalizes sensory gating. Similarly, patients with schizophrenia fail to suppress the P50 auditory event-related potential to repeated stimuli, which appears to be correlated with decreased vigilance and distractibility (Adler, Pachtman, Franks, Pecevic, Waldo, & Freedman, 1982; Clementz, Geyer, & Braff, 1997; Cullum *et al.*, 1993; Griffith, O'Neill, Petty, Garver, Young, & Freedman, 1998). Similar to studies

in rats, nicotine administration also transiently reversed the P50 deficits seen in patients with schizophrenia (Adler, Hoffer, Wiser, & Freedman, 1993). The failure to suppress the P50 response in patients with schizophrenia may be related to alterations in nAChR function, specifically activity of  $\alpha 7$  nicotinic receptors in the hippocampus. Post-mortem brain analyses revealed that schizophrenics have reduced numbers of  $\alpha 7$  nicotinic receptors in the hippocampus (Freedman, Hall, Adler, & Leonard, 1995). Within the hippocampus, nicotine has been shown to induce glutamate release through activation of  $\alpha 7$  nicotinic receptors (Gray *et al.*, 1996), thus leading to the hypothesis that enhanced hippocampal glutamate release modulates sensory gating (Dalack, Healy, & Meador-Woodruff, 1998). It has been postulated that initial auditory stimulation activates  $\alpha 7$  nicotinic receptors in the hippocampus to release glutamate (Leonard *et al.*, 1996). Glutamate then would activate receptors on GABA interneurons to release GABA and inhibit hippocampal neurons, thus reducing activation by further auditory stimulation (Leonard *et al.*, 1996). Accordingly, it has been suggested that smoking facilitates activation of  $\alpha 7$  nicotinic receptors to effectively normalize attentional processing in patients with schizophrenia (Dalack *et al.*, 1998). Similar to all other nAChRs,  $\alpha 7$  receptors are activated by nicotine or acetylcholine and then become desensitized to further stimulation (Seguela, Wadiche, Dineley-Miller, Dani, & Patrick, 1993). Interestingly, the finding of decreased  $\alpha 7$  receptor expression in the hippocampus of schizophrenia smokers suggests that the  $\alpha 7$  receptor may not upregulate in the presence of chronic nicotine. Thus, the neuropharmacological basis of increased smoking among schizophrenic patients may be hypothesized to also involve stimulation of nAChRs composed of  $\alpha$  and  $\beta$  subunits in addition to  $\alpha 7$  receptor activation.

### Neurobiology of acute and protracted nicotine abstinence—synthesis

A large proportion of smokers, at some point in their smoking career, have tried to quit, albeit unsuccessfully. Only 10–20% of those who attempt to quit are still abstinent after 1 year. The determining factors for relapse include craving for nicotine and negative emotional states including depressed mood and psychosocial stress (Doherty, Kinnunen, Militello, & Garvey, 1995; Swan, Ward, & Jack, 1996). Interestingly, the best predictor of relapse between 4 and 12 months of abstinence was smoking at least one cigarette between the quitting day and 4 months (Nides *et al.*, 1995). This finding suggests that a heightened sensitivity to the reinforcing value of nicotine persists into periods of protracted abstinence. These powerful reinforcing effects could be especially detrimental for anyone attempting to quit smoking, in that a single relapse episode may progress rapidly to a full relapse.

From the data reviewed above, it is possible to develop a preliminary hypothesis of the neurobiological mechanisms underlying acute nicotine withdrawal. Based on the evidence of decreased dopamine in both the nucleus accumbens and the central nucleus of the amygdala during precipitated nicotine withdrawal (Hildebrand *et al.*, 1998; Panagis, Hildebrand, Svensson, & Nomikos, 1998), it may be hypothesized that adaptations of dopamine function in components of the extended amygdala partly modulate the depressed mood and dysphoria associated with acute nicotine withdrawal. These affective changes may be the best predictors of relapse to cigarette smoking. Alterations in serotonin function also are proposed to be involved in affective as well as sleep- and appetite-related changes during acute nicotine withdrawal.

It has been suggested that long-term drug exposure contributes to a change in hedonic set point which may increase the positive reinforcing efficacy of the drug (Koob & LeMoal, 1997). Thus, the neuroadaptations proposed to occur with long-term, chronic nicotine exposure would be hypothesized to play a role in protracted abstinence from nicotine by contributing to a heightened sensitivity to the positive reinforcing effects of nicotine. As discussed above, one of the effects of nicotine withdrawal is decreased dopamine neurotransmission within the mesolimbic dopamine system. The initial decrease in dopamine is hypothesized to modulate some of the negative affective symptoms associated with acute nicotine withdrawal; however, the role of adaptive mechanisms within the mesolimbic dopamine system during protracted abstinence is unknown.

While the proposed long-term alterations in the dopaminergic reward system may contribute to an increased sensitivity to nicotine during protracted abstinence, the effects, even during acute withdrawal, are not dramatic. Other neuropharmacological mechanisms such as alterations in opioid peptide function, serotonin, and even glutamate may be speculated to have a role. Evidence suggests that stress systems in the brain also may play a major role in vulnerability to relapse. Potential recruitment of systems such as corticotropin-releasing factor have been hypothesized to extend into periods of protracted abstinence, thus contributing to an increased stress response and anxiety during abstinence (Kreek & Koob, 1998). Increased corticotropin-releasing factor function has been measured in the amygdala during withdrawal from opiates, cocaine, ethanol, and cannabinoids and may modulate the stress response during abstinence (Heinrichs, Menzaghi, Schulteis, Koob, & Stinus, 1995; Koob, Heinrichs, Menzaghi, Merlo Pich, & Britton, 1994; Pich *et al.*, 1996; Richter & Weiss, 1999). As such, activation of brain stress systems may contribute to negative symptoms of withdrawal. It also has been suggested that an overactive stress response may make an individual vulnerable to relapse (Kreek & Koob, 1998). While the effects of acute nicotine and withdrawal on corticotropin-releas-

ing factor function are unclear, one can speculate that acute nicotine decreases corticotropin-releasing factor, contributing to a sense of relaxation and calm, whereas nicotine withdrawal is characterized by increased corticotropin-releasing factor function, contributing to an increased stress response during abstinence. It is further hypothesized that increased corticotropin-releasing factor function persists into protracted nicotine abstinence, thus contributing to an increased vulnerability for relapse. An individual with a heightened corticotropin-releasing factor-induced stress response may be more likely to revert to previously learned coping patterns (i.e., smoking to facilitate relaxation).

To summarize, the transition from occasional or recreational drug use to dependence may involve 'affective habituation' or a change in hedonic set point, such that abstinence leads to negative affective consequences, thus contributing to the maintenance of drug dependence through negative reinforcement processes (Koob, 1996; Koob & Le Moal, 1997). Furthermore, the change in hedonic set point may be reflected in an increase in drug taking behavior (Ahmed & Koob, 1998). For nicotine, the transition from occasional cigarette smoking to chronic, dependent use in humans may involve an increase in hedonic set point requiring increased nicotine intake to reach the desired level of stimulation. The underlying mechanisms for alterations in hedonic processes that occur with chronic nicotine exposure are hypothesized to involve decreased dopamine, serotonin, and opioid peptide function, and activation of corticotropin-releasing factor function within the extended amygdala. These neurochemical alterations would require increased nicotine intake to reach and maintain a certain level of hedonic function within the midbrain reward pathways while concurrently avoiding the onset of affective withdrawal symptoms. During abstinence, the increase in hedonic set point is hypothesized to persist, and with the experience of the negative affective symptoms of withdrawal, the abstinent smoker would be especially vulnerable to relapse.

Based on the current knowledge of the neurobiology of nicotine withdrawal and the proposed neuroadaptations occurring in the presence of chronic nicotine, several avenues of pharmacological treatment of nicotine dependence warrant consideration. As discussed above, a negative affective state may be the best predictor of relapse to cigarette smoking and pharmacological therapies designed to alleviate negative affect induced by nicotine withdrawal should be explored. Serotonergic dysfunction has been hypothesized to partially modulate negative affect during withdrawal, but additional studies are needed to fully explore the role of serotonin in nicotine withdrawal. It also has been suggested that decreased dopamine function may underlie some of the negative affective symptoms of nicotine withdrawal. Therefore, the development of therapeutic compounds that target the mesolimbic dopamine system as an aid to smoking cessation should be

examined. Another promising treatment approach to aid in smoking cessation is regulation of stress systems involving corticotropin-releasing factor. Antagonists of corticotropin-releasing factor receptors may help reduce the symptoms of anxiety, frustration, and irritability associated with nicotine withdrawal which would likely contribute to significantly higher success rates of abstinence. Finally, further exploration into glutamate pathways involved in nicotine withdrawal symptoms could serve as the basis for the development of NMDA or metabotropic glutamate receptor compounds which may help to alleviate some of the impairment in cognitive abilities associated with nicotine withdrawal. Overall, from the above review and hypotheses, the focus of neuropharmacological research for the development of novel pharmacotherapies for nicotine addiction should involve manipulations of central serotonergic, dopaminergic, corticotropin-releasing factor, and glutamatergic systems.

## Conclusions

In conclusion, the positive reinforcing effects of nicotine appear to be modulated through direct and indirect stimulatory actions on the mesolimbic dopamine system via actions on glutamatergic, GABAergic, opioid peptide, and serotonergic systems. In the presence of chronic nicotine, neurochemical adaptations occur to mediate the symptoms of nicotine withdrawal. The neurobiology of acute nicotine withdrawal and protracted abstinence is proposed to involve alterations within dopaminergic, serotonergic, opioid peptide, and possibly corticotropin-releasing factor systems, which are hypothesized to contribute to the negative affective state associated with nicotine abstinence. While the hypothesized underlying neurobiological mechanisms mediating the negative affective aspects of nicotine withdrawal are mostly speculative, these hypotheses have heuristic value. Future experiments exploring these hypotheses will yield important information about the central actions of nicotine and advance our knowledge of the neural mechanisms involved in nicotine dependence and withdrawal, and the role of cholinergic neurotransmission in depression and schizophrenia. Thus, such investigations may aid the development of new pharmacological agents for smoking cessation, depression, and schizophrenia.

## Acknowledgments

This is publication number 12132-NP from The Scripps Research Institute. Shelly S. Watkins was supported by a NIDA Individual National Research Service Award (DA05898). This work was also supported by a Tobacco-Related Disease Research Program grant from the State of California (AM), a Novartis Research grant (AM), and NIDA grants DA08467 (GFK) and DA04398 (GFK). The authors would like to thank Drs Neal Swerdlow, John Wixted, Sandra Brown, Bengt Hildebrand, Mark Geyer, and Amanda Harrison for their input during the writing of this review. The authors would also like to thank Mike Arends for computer literature searches and editorial assistance.

## References

- Acri JB, Brown KJ, Saah MI, Grunberg NE. 1995. Strain and age differences in acoustic startle responses and effects of nicotine in rats. *Pharmacology, Biochemistry and Behavior* 50:191–198.
- Adler LE, Pachtman E, Franks R, Pecevic M, Waldo MC, Freedman R. 1982. Neuropsychological evidence for a defect in neuronal mechanisms involved in sensory gating in schizophrenia. *Biological Psychiatry* 17:639–654.
- Adler LE, Hoffer LD, Wiser A, Freedman R. 1993. Normalization of auditory physiology by cigarette smoking in schizophrenic patients. *American Journal of Psychiatry* 150:1856–1861.
- Ahmed SH, Koob GF. 1998. Transition from moderate to excessive drug intake: change in hedonic set point. *Science* 282:298–300.
- Alheid GF, Heimer L. 1988. New perspectives in basal forebrain organization of special relevance for neuropsychiatric disorders: the striatopallidal, amygdaloid, and corticopetal components of substantia inominata. *Neuroscience* 27:1–39.
- Alkondon M, Albuquerque EX. 1993. Diversity of nicotinic acetylcholine receptors in rat hippocampal neurons I. Pharmacological and functional evidence for distinct structural subtypes. *Journal of Pharmacology and Experimental Therapeutics* 265:1455–1473.
- American Psychiatric Association. 1994. *Diagnostic and Statistical Manual of Mental Disorders* (4th edn). American Psychiatric Press, Washington, DC.
- Americ SP, Sullivan JP, Williams M. 1995. Neuronal nicotinic acetylcholine receptors: novel targets for central nervous system therapeutics. In Bloom FE, Kupfer DJ, eds. *Psychopharmacology: The Fourth Generation of Progress*. New York, Raven Press, pp. 95–110.
- Ascher JA, Cole JO, Colin JN, Feighner JP, Ferris RM, Fibiger HC, Golden RN, Martin P, Potter WZ, Richelson E, Sulser F. 1995. Bupropion: a review of its mechanism of antidepressant activity. *Journal of Clinical Psychiatry* 56:395–401.
- Baldo BA, Jain K, Veraldi L, Koob GF, Markou A. 1999. A dopamine D1 agonist elevates self-stimulation thresholds: comparison to other dopamine-selective drugs. *Pharmacology, Biochemistry and Behavior* 62:659–672.
- Baldwin HA, Rassnick S, Rivier J, Koob GF, Britton KT. 1991. CRF antagonist reverses the 'anxiogenic' response to ethanol withdrawal in the rat. *Psychopharmacology* 103:227–232.
- Balfour DJ. 1984. Nicotine and the tobacco smoking habit. In Balfour DJ, ed. *International Encyclopedia of Pharmacology and Therapeutics*. New York: Pergamon Press, pp. 61–74.
- Battaglia G, Bruno V, Ngomba RT, Di Grezia R, Copani A, Nicoletti F. 1998. Selective activation of group-II metabotropic glutamate receptors is protective against excitotoxic neuronal death. *European Journal of Pharmacology* 356:271–274.
- Bauco P, Wise RA. 1994. Potentiation of lateral hypothalamic and midline mesencephalic brain stimulation reinforcement by nicotine: examination of repeated treatment. *Journal of Pharmacology and Experimental Therapeutics* 271:294–301.
- Benowitz NL. 1988. Pharmacologic aspects of cigarette smoking and nicotine addiction. *New England Journal of Medicine* 319:1318–1330.
- Benowitz NL. 1996. Pharmacology of nicotine: addiction and therapeutics. *Annual Review of Pharmacology and Toxicology* 36:597–613.
- Benwell ME, Balfour DJ. 1979. Effects of nicotine administration and its withdrawal on plasma corticosterone and brain 5-hydroxyindoles. *Psychopharmacology* 63:7–11.
- Benwell ME, Balfour DJ. 1992. The effects of acute and repeated nicotine treatment on nucleus accumbens dopamine and locomotor activity. *British Journal of Pharmacology* 105:849–856.
- Benwell ME, Balfour DJ, Anderson JM. 1988. Evidence that tobacco smoking increases the density of (–)-[<sup>3</sup>H] nicotine binding sites in human brain. *Journal of Neurochemistry* 50:1243–1247.
- Benwell ME, Balfour DJ, Anderson JM. 1990. Smoking-associated changes in the serotonergic systems of discrete regions of human brain. *Psychopharmacology* 102:68–72.
- Benwell ME, Balfour DJ, Lucchi HM. 1993. Influence of tetrodotoxin and calcium changes in extracellular dopamine levels evoked by systemic nicotine. *Psychopharmacology* 112:467–474.
- Bhat RV, Marks MJ, Collins AC. 1994. Effects of chronic nicotine infusion on kinetics of high-affinity nicotine binding. *Journal of Neurochemistry* 62:574–581.
- Bolan JP, Francis CM, Henderson Z. 1991. Cholinergic input to dopaminergic neurons in the substantia nigra: a double immunohistochemical study. *Neuroscience* 41:483–494.

- Boydjjeva NI, Sarkar DK. 1997. The secretory response of hypothalamic  $\beta$ -endorphin neurons to acute and chronic nicotine treatments following nicotine withdrawal. *Life Sciences* 61:PL59–PL66.
- Breslau N, Kilbey MM, Andreski P. 1993. Nicotine dependence and major depression: new evidence from a prospective investigation. *Archives of General Psychiatry* 50:31–35.
- Bruno V, Battaglia G, Copani A, Giffard RG, Raciti G, Raffaele R, Shinozaki H, Nicoletti F. 1995. Activation of class II or III metabotropic glutamate receptors protects cultured cortical neurons against excitotoxic degeneration. *European Journal of Neuroscience* 7:1906–1913.
- Bubser M, Koch M. 1994. Prepulse inhibition of the acoustic startle response of rats is reduced by 6-hydroxydopamine lesions of the medial prefrontal cortex. *Psychopharmacology* 113:487–492.
- Buisson A, Yu SP, Choi DW. 1996. DCG-IV selectively attenuates rapidly triggered NMDA-induced neurotoxicity in cortical neurons. *European Journal of Neuroscience* 8:138–143.
- Caine SB, Koob GF. 1994. Effects of mesolimbic dopamine depletion on responding maintained by cocaine and food. *Journal of the Experimental Analysis of Behavior* 61:213–221.
- Caine SB, Heinrichs SC, Coffin VL, Koob GF. 1995. Effects of dopamine D-1 antagonist SCH23390 microinjected into the accumbens, amygdala, or striatum on cocaine self-administration in the rat. *Brain Research* 692:47–56.
- Cesselin F. 1995. Opioid and anti-opioid peptides. *Fundamental and Clinical Pharmacology* 9:409–433.
- Changeux JP, Devillers-Thiery A, Chemouilli P. 1984. Acetylcholine receptor: an allosteric protein. *Science* 225:1335–1345.
- Chergui K, Charley PJ, Akaoka H, Saunier CF, Brunet JL, Buda M, Svensson TH, Chouvet G. 1993. Tonic activation of NMDA receptors causes spontaneous burst discharge of rat midbrain dopamine neurons in vivo. *European Journal of Neuroscience* 5:137–144.
- Churchill L, Dilts RP, Kalivas PW. 1992. Autoradiographic localization of gamma-aminobutyric acid A receptors within the ventral tegmental area. *Neurochemical Research* 17:101–106.
- Clarke PBS, Kumar R. 1983. The effects of nicotine on locomotor activity in non-tolerant and tolerant rats. *British Journal of Pharmacology* 78:329–337.
- Clarke PBS, Pert A. 1985. Autoradiographic evidence for nicotinic receptors on nigrostriatal and mesolimbic dopaminergic neurons. *Brain Research* 348:355–358.
- Clarke PBS, Hommer DW, Pert A, Skirboll LR. 1987. Innervation of substantia nigra neurons by cholinergic afferents from pedunculo-pontine nucleus in the rat: neuroanatomical and electrophysiological evidence. *Neuroscience* 23:1011–1019.
- Clementz BA, Geyer MA, Braff DL. 1997. P50 suppression among schizophrenia and normal comparison subjects: a methodological analysis. *Biological Psychiatry* 41:1035–1044.
- Collins AC, Bhat RV, Pauly JR, Marks MJ. 1990. Modulation of nicotine receptors by chronic exposure to nicotinic agonists and antagonists. In Bock G, Marsh J, eds. *The Biology of Nicotine Dependence* (Series title: *Ciba Foundation Symposium*, Vol. 152). New York: John Wiley and Sons, pp. 87–105.
- Coppen A. 1967. The biochemistry of affective disorders. *British Journal of Psychiatry* 113:1237–1264.
- Corrigan WA, Coen KM. 1989. Nicotine maintains robust self-administration in rats on a limited-access schedule. *Psychopharmacology* 99:473–478.
- Corrigan WA, Coen KM. 1991. Selective dopamine antagonists reduce nicotine self-administration. *Psychopharmacology* 104:171–176.
- Corrigan WA, Coen KM. 1994. Nicotine self-administration and locomotor activity are not modified by the 5HT<sub>2</sub> antagonists ICS 205–930 and MDL 72222. *Pharmacology, Biochemistry and Behavior* 49:67–71.
- Corrigan WA, Franklin KBJ, Coen KM, Clarke PBS. 1992. The mesolimbic dopaminergic system is implicated in the reinforcing effects of nicotine. *Psychopharmacology* 107:285–289.
- Corrigan WA, Coen KM, Adamson KL. 1994. Self-administered nicotine activates the mesolimbic dopamine system through the ventral tegmental area. *Brain Research* 653:278–284.
- Corringier PJ, Bertrand S, Bohler S, Edelstein SJ, Changeux JP, Bertrand D. 1998. Critical elements determining diversity in agonist binding and desensitization on neuronal nicotinic acetylcholine receptors. *Journal of Neuroscience* 18:648–657.
- Crippens D, Robinson TE. 1994. Withdrawal from morphine or amphetamine: different effects on dopamine in the ventral-medial striatum studied with microdialysis. *Brain Research* 650:56–62.
- Cullum CM, Harris JG, Waldo MC, Smernoff E, Madison A, Nagamoto HT, Griffith J, Adler LE, Freedman R. 1993. Neurophysiological and neuropsychological evidence for attentional dysfunction in schizophrenia. *Schizophrenia Research* 10:131–141.
- Curzon P, Kim DJ, Decker MW. 1994. Effect of nicotine, lobeline, and pemecamylamine on sensory gating in the rat. *Pharmacology, Biochemistry and Behavior* 49:877–882.
- Dalack GW, Meador-Woodruff JH. 1996. Smoking, smoking withdrawal and schizophrenia: case reports and a review of the literature. *Schizophrenia Research* 22:133–141.
- Dalack GW, Healy DJ, Meador-Woodruff JH. 1998. Nicotine dependence in schizophrenia: clinical phenomena and laboratory findings. *American Journal of Psychiatry* 155:1490–1501.
- Dani JA, Heinemann S. 1996. Molecular and cellular aspects of nicotine abuse. *Neuron* 16:905–908.
- Davenport KE, Houdi AA, VanLoon GR. 1990. Nicotine protects against mu-opioid receptor antagonism by beta-funaltrexamine: evidence for nicotine-induced release of endogenous opioid. *Neuroscience Letters* 113:40–46.
- de Olmos JS, Alheid GF, Beltramino CA. 1985. Amygdala. In Paxinos G, ed. *The Rat Nervous System, Vol 1*. New York: Academic Press, pp. 223–334.
- Decina P, Caracci G, Sandik R, Berman W, Mukherjee S, Scapicchio P. 1990. Cigarette smoking and neuroleptic-induced parkinsonism. *Biological Psychiatry* 28:502–508.
- Delgado PL, Charney DS, Price LH, Aghajanian GK, Landis H, Heninger GR. 1990. Serotonin function and the mechanism of antidepressant action: reversal of antidepressant-induced remission by rapid depletion of plasma tryptophan. *Archives of General Psychiatry* 47:411–418.
- Delgado PL, Price LH, Miller HL, Salomon RM, Licinio J, Krystal JH, Heninger GR, Charney DS. 1991. Rapid serotonin depletion as a provocative challenge test for patients with major depression: relevance to antidepressant action and the neurobiology of depression. *Psychopharmacology Bulletin* 27:321–330.
- Dewey SL, Brodie JD, Gerasimov M, Horan B, Gardner EL, Ashby CR Jr. 1999. A pharmacologic strategy for the treatment of nicotine addiction. *Synapse* 31:76–86.
- Doherty K, Kinnunen T, Militello FS, Garvey AJ. 1995. Urges to smoke during the first month of abstinence: relationship to relapse and predictors. *Psychopharmacology* 119:171–178.
- Edwards NB, Murphy JK, Downs AD, Ackerman BJ, Rosenthal TL. 1989. Doxepin as an adjunct to smoking cessation: a double-blind pilot study. *American Journal of Psychiatry* 146:373–376.
- Epping-Jordan MP, Markou A, Koob GF. 1998a. The dopamine D-1 receptor antagonist SCH23390 injected into the dorsolateral bed nucleus of the stria terminalis decreased cocaine reinforcement in the rat. *Brain Research* 784:105–115.
- Epping-Jordan MP, Watkins SS, Koob GF, Markou A. 1998b. Dramatic decreases in brain reward function during nicotine withdrawal. *Nature* 393:76–79.
- Flores CM, Rogers SW, Pabreza LA, Wolfe BB, Kellar KJ. 1992. A subtype of nicotinic cholinergic receptor in rat brain is composed of alpha4-subunit and beta2-subunit and is upregulated by chronic nicotine treatment. *Molecular Pharmacology* 41:31–37.
- Freedman E, Hall M, Adler LE, Leonard S. 1995. Evidence in postmortem tissue for decreased numbers of hippocampal nicotinic receptors in schizophrenia. *Biological Psychiatry* 38:22–33.
- Freedman R, Adler LE, Myles-Worsley M, Nagamoto HT, Miller C, Kisley M, McRae K, Cawthra E, Waldo M. 1996. Inhibitory gating of an evoked response to repeated auditory stimuli in schizophrenic and normal subjects: human recordings, computer simulation, and an animal model. *Archives of General Psychiatry* 53:1114–1121.
- Fung YK, Schmid MJ, Anderson TM, Lau Y-S. 1996. Effects of nicotine withdrawal on central dopaminergic systems. *Pharmacology, Biochemistry and Behavior* 53:635–640.
- Geyer MA, Braff DL. 1987. Startle habituation and sensorimotor gating in schizophrenia and related animal models. *Schizophrenia Bulletin* 13:643–668.
- Geyer MA, Puerto A, Menkes DB, Segal DS, Mandell AJ. 1976. Behavioral studies following lesions of the mesolimbic and mesostriatal serotonergic pathways. *Brain Research* 106:256–270.
- Geyer MA, Peterson LR, Rose GJ. 1980. Effects of serotonergic lesions on investigatory responding by rats in a holeboard. *Behavioral and Neural Biology* 30:160–177.
- Geyer MA, Wilkinson LS, Humby T, Robbins TW. 1993. Isolation rearing of rats produces a deficit in prepulse inhibition of acoustic

- startle similar to that in schizophrenia. *Biological Psychiatry* 34:361–372.
- Giorgiuffe-Chesselet MF, Kemel ML, Wandscheer D, Glowinski J. 1979. Regulation of dopamine release by presynaptic nicotinic receptors in rat striatal slices: effects of nicotine in a low concentration. *Life Sciences* 25:1257–1262.
- Glassman AH. 1993. Cigarette smoking: implications for psychiatric illness. *American Journal of Psychiatry* 150:546–553.
- Glassman AH, Stetner F, Walsh BT. 1988. Heavy smokers, smoking cessation, and clonidine: results of a double-blind, randomized trial. *Journal of the American Medical Association* 259:2863–2866.
- Glassman AH, Helzer JE, Covey LS, Cottler LB, Stetner F, Tipp JE, Johnson J. 1990. Smoking, smoking cessation, and major depression. *Journal of the American Medical Association* 264:1546–1549.
- Goff DC, Henderson DC, Amico E. 1992. Cigarette smoking in schizophrenia: relationship to psychopathology and medication side effects. *American Journal of Psychiatry* 149:1189–1194.
- Gray R, Rajan AS, Radcliffe KA, Yakehiro M, Dani JA. 1996. Hippocampal synaptic transmission enhanced by low concentrations of nicotine. *Nature* 383:713–716.
- Grenhoff J, Aston-Jones G, Svensson TH. 1986. Nicotinic effects on the firing pattern of midbrain dopamine neurons. *Acta Physiologica Scandinavica* 128:351–358.
- Griffith JM, O'Neill JE, Petty F, Garver D, Young D, Freedman R. 1998. Nicotinic receptor desensitization and sensory gating deficits in schizophrenia. *Biological Psychiatry* 44:98–106.
- Heimer L, Alheid GF. 1991. Piecing together the puzzle of forebrain anatomy. In Napier TC, Kalivas PW, Hanin I, eds. *The Basal Forebrain: Anatomy to Function* (Series title: *Advances in Experimental Medicine and Biology*, Vol. 295). New York: Plenum Press, pp. 1–42.
- Heimer L, Alheid GF, Zabaorszky L. 1985. The basal ganglia. In Paxinos G, ed. *The Rat Nervous System*. Sydney: Academic Press, pp. 37–74.
- Heimer L, Zahm DS, Churchill L, Kalivas PW, Wohltmann C. 1991. Specificity in the projection patterns of accumbal core and shell in the rat. *Neuroscience* 41:89–125.
- Heinrichs SC, Menzaghi F, Schulteis G, Koob GF, Stinus L. 1995. Suppression of corticotropin-releasing factor in the amygdala attenuates aversive consequences of morphine withdrawal. *Behavioral Pharmacology* 6:74–80.
- Helton DR, Modlin DL, Tizzano JP, Rasmussen K. 1993. Nicotine withdrawal: a behavioral assessment using schedule controlled responding, locomotor activity, and sensorimotor reactivity. *Psychopharmacology* 113:205–210.
- Helton DR, Tizzano JP, Monn JA, Schoepp DD, Kallman MJ. 1997. LY354740: A metabotropic glutamate receptor agonist which ameliorates symptoms of nicotine withdrawal in rats. *Neuropharmacology* 36:1511–1516.
- Henry JL. 1986. Role of circulating opioids in the modulation of pain. *Annals of the New York Academy of Sciences* 467:169–181.
- Herz A. 1997. Endogenous opioid systems and alcohol addiction. *Psychopharmacology* 129:99–111.
- Hildebrand BE, Nomikos GG, Bondjers C, Nisell M, Svensson TH. 1997. Behavioral manifestations of the nicotine abstinence syndrome in the rat: peripheral versus central mechanisms. *Psychopharmacology* 129:348–356.
- Hildebrand BE, Nomikos GG, Hertel P, Schilström B, Svensson TH. 1998. Reduced dopamine output in the nucleus accumbens but not in the medial prefrontal cortex in rats displaying a mecamylamine-precipitated nicotine withdrawal syndrome. *Brain Research* 779:214–225.
- Hildebrand BE, Panagis G, Svensson TH, Nomikos GG. 1999. Behavioral and biochemical manifestations of mecamylamine-precipitated nicotine withdrawal in the rat: role of nicotinic receptors in the ventral tegmental area. *Neuropsychopharmacology* 21:560–574.
- Houdi AA, Pierzchala K, Marson L, Palkovits M, VanLoon GR. 1991. Nicotine-induced alteration in try-gly-gly and met-enkephalin in discrete brain nuclei reflects altered enkephalin neuron activity. *Peptides* 12:161–166.
- Hsu YN, Amin J, Weiss DS, Wecker L. 1996. Sustained nicotine exposure differentially affects alpha 3 beta 2 and alpha 4 beta 2 neuronal nicotinic receptors expressed in *Xenopus* oocytes. *Journal of Neurochemistry* 66:667–675.
- Hu XT, White FJ. 1996. Glutamate receptor regulation of rat nucleus accumbens neurons in vivo. *Synapse* 23:208–218.
- Hughes JR. 1992. Tobacco withdrawal in self-quitters. *Journal of Consulting and Clinical Psychology* 60:689–697.
- Hughes JR, Hatsukami DK, Pickens RW, Krahn D, Malin S, Luknic A. 1984. Effect of nicotine on the tobacco withdrawal syndrome. *Psychopharmacology* 83:82–87.
- Hughes JR, Hatsukami DK, Mitchell JE, Dahlgren LA. 1986. Prevalence of smoking among psychiatric outpatients. *American Journal of Psychiatry* 143:993–997.
- Hughes JR, Gust SW, Skoog K, Keenan RM, Fenwick JW. 1991. Symptoms of tobacco withdrawal: a replication and extension. *Archives of General Psychiatry* 48:52–59.
- Hurt RD, Sachs DPL, Glover ED, Offord KP, Johnston JA, Dale LC, Khayrallah MA, Schroeder DR, Glover PN, Sullivan CR, Croghan IT, Sullivan PM. 1997. A comparison of sustained-release bupropion and placebo for smoking cessation. *New England Journal of Medicine* 337:1195–1202.
- Huston-Lyons D, Kornetsky C. 1992. Effects of nicotine on the threshold for rewarding brain stimulation in rats. *Pharmacology, Biochemistry and Behavior* 41:755–759.
- Jarvik ME. 1991. Beneficial effects of nicotine. *British Journal of Addiction* 86:571–575.
- Jibson MD, Tandon R. 1998. New atypical antipsychotic medications. *Journal of Psychiatric Research* 32:215–228.
- Jorenby DE, Leischow SJ, Nides MA, Rennard SI, Johnston JA, Hughes AR, Smith SS, Muramoto ML, Daughton DM, Doan K, Fiore MC, Baker TB. 1999. A controlled trial of sustained-release bupropion, a nicotine patch, or both for smoking cessation. *New England Journal of Medicine* 340:685–691.
- Kalivas PW, Churchill L, Klitenick MA. 1993. GABA and enkephalin projection from the nucleus accumbens and ventral pallidum to the ventral tegmental area. *Neuroscience* 57:1047–1060.
- Karras A, Kane JM. 1980. Naloxone reduces cigarette smoking. *Life Sciences* 27:1541–1545.
- Koob GF. 1996. Drug addiction: the yin and yang of hedonic homeostasis. *Neuron* 16:893–896.
- Koob GF, Bloom FE. 1988. Cellular and molecular mechanisms of drug dependence. *Science* 242:715–723.
- Koob GF, LeMoal M. 1997. Drug abuse: hedonic homeostatic dysregulation. *Science* 278:52–58.
- Koob GF, Markou A, Weiss F, Schulteis G. 1993. Opponent process and drug dependence: neurobiological mechanisms. *Seminars in the Neurosciences* 5:351–358.
- Koob GF, Heinrichs SC, Menzaghi F, Merlo Pich E, Britton KT. 1994. Corticotropin-releasing factor, stress and behavior. *Seminars in the Neurosciences* 6:221–229.
- Koob GF, Sanna PP, Bloom FE. 1998. Neuroscience of addiction. *Neuron* 21:467–476.
- Kornetsky C, Esposito RU. 1981. Reward and detection thresholds for brain stimulation: dissociative effects of cocaine. *Brain Research* 209:496–500.
- Kreek MJ, Koob GF. 1998. Drug dependence: stress and dysregulation of brain reward pathways. *Drug and Alcohol Dependence* 51:23–47.
- Krishnan-Sarin S, Rosen MI, O'Malley SS. 1999. Naloxone challenge in smokers: preliminary evidence of an opioid component in nicotine dependence. *Archives of General Psychiatry* 56:663–668.
- Krystal JH, D'Souza DC, Madonick S, Petrakis IL. 1999. Toward a rational pharmacotherapy of comorbid substance abuse in schizophrenic patients. *Schizophrenia Research* 35:S35–S49.
- Leith NJ, Barrett RJ. 1976. Amphetamine and the reward system: evidence for tolerance and post-drug depression. *Psychopharmacologia* 46:19–25.
- Leonard S, Adams C, Breese CR, Adler LE, Bickford P, Byerley W, Coon H, Griffith JM, Miller C, Myles-Worsley M, Nagamoto HT, Rollins Y, Stevens KE, Waldo M, Freedman R. 1996. Nicotinic receptor function in schizophrenia. *Schizophrenia Bulletin* 22:431–445.
- Li X, Raimie DG, McCarley RW, Greene RW. 1998. Presynaptic nicotinic receptors facilitate monoaminergic transmission. *Journal of Neuroscience* 18:1904–1912.
- Lin D, Koob GF, Markou A. (1999). Differential effects of withdrawal from chronic amphetamine or fluoxetine administration on brain stimulation reward in the rat: Interactions between the two drugs. *Psychopharmacology* 145:283–294.
- Malin DH, Lake JR, Newlin-Maultsby P, Roberts LK, Lanier JG, Carter VA, Cunningham JS, Wilson OB. 1992. Rodent model of nicotine abstinence syndrome. *Pharmacology, Biochemistry and Behavior* 43:779–784.



- Malin DH, Lake JR, Carter VA, Cunningham JS, Wilson OB. 1993. Naloxone precipitates nicotine abstinence syndrome in the rat. *Psychopharmacology* 112:339–342.
- Malin DH, Lake JR, Carter VA, Cunningham JS, Hebert KM, Conrad DL, Wilson OB. 1994. The nicotinic antagonist mecamylamine precipitates nicotine abstinence syndrome in the rat. *Psychopharmacology* 115:180–184.
- Malin DH, Lake JR, Short PE, Blossman JB, Lawless BA, Schopen CK, Sailer EE, Burgess K, Wilson OB. 1996. Nicotine abstinence syndrome precipitated by an analog of neuropeptide FF. *Pharmacology, Biochemistry and Behavior* 54:581–585.
- Malin DH, Lake JR, Upchurch TP, Shenoi M, Rajan N, Schweinle WE. 1998. Nicotine abstinence syndrome precipitated by the competitive nicotinic antagonist dihydro-beta-erythroidine. *Pharmacology, Biochemistry and Behavior* 60:609–613.
- Marder SR, Wirshing WC, Van Putten T. 1991. Drug treatment of schizophrenia: overview of recent research. *Schizophrenia Research* 4:81–90.
- Markou A, Koob GF. 1991. Postcocaine anhedonia: an animal model of cocaine withdrawal. *Neuropsychopharmacology* 4:17–26.
- Markou A, Kosten TR, Koob GF. 1998. Neurobiological similarities in depression and drug dependence: a self-medication hypothesis. *Neuropsychopharmacology* 18:135–174.
- Marks MJ, Pauly JR, Gross SD, Deneris ES, Hermans-Borgmeyer I, Heinemann S, Collins AC. 1992. Nicotine binding and nicotinic receptor subunit RNA after chronic nicotine treatment. *Journal of Neuroscience* 12:2765–2784.
- Marshall DL, Redfern PH, Wonnacott S. 1997. Presynaptic nicotinic modulation of dopamine release in the three ascending pathways studied by in vivo microdialysis: comparison of naive and chronic nicotine-treated rats. *Journal of Neurochemistry* 68:1511–1519.
- McGehee DS, Heath MJS, Gelber S, Devay P, Role L. 1995. Nicotine enhancement of fast excitatory synaptic transmission in CNS by presynaptic receptors. *Science* 269:1692–1696.
- Menza MA, Grossman N, Van Horn M, Cody R, Forman N. 1991. Smoking and movement disorders in psychiatric patients. *Biological Psychiatry* 30:109–115.
- Miyamoto M, Ishida M, Shinozaki H. 1997. Anticonvulsive and neuroprotective actions of a potent agonist (DCG-IV) for group II metabotropic glutamate receptors against intraventricular kainate in the rat. *Neuroscience* 77:131–140.
- Moller HJ. 1998. Novel antipsychotics and negative symptoms. *International Clinical Psychopharmacology* 13:S43–S47.
- Moolten M, Kornetsky C. 1990. Oral self-administration of ethanol and not experimenter-administered ethanol facilitates rewarding electrical brain stimulation. *Alcohol* 7:221–225.
- Mosner A, Kuhlman G, Roehm C, Vogel WH. 1997. Serotonergic receptors modify the voluntary intake of alcohol and morphine but not of cocaine and nicotine by rats. *Pharmacology* 54:186–192.
- Nemeth-Coslett R, Griffiths RR. 1986. Naloxone does not affect cigarette smoking. *Psychopharmacology* 89:261–264.
- Nides MA, Rakos RF, Gonzales D, Murray RP, Tashkin DP, Bjornson-Benson, WM, Lindgren, P, Connett JE. 1995. Predictors of initial smoking cessation and relapse through the first two years of the Lung Health Study. *Journal of Consulting and Clinical Psychology* 63:60–69.
- Nisell M, Nomikos GG, Svensson TH. 1994. Systemic nicotine induced dopamine release in the rat nucleus accumbens is regulated by nicotinic receptors in the ventral tegmental area. *Synapse* 16:36–44.
- Nisell M, Nomikos GG, Svensson TH. 1995. Nicotine dependence, midbrain dopamine systems and psychiatric disorders. *Pharmacology and Toxicology* 76:157–162.
- Nisell M, Marcus M, Nomikos GG, Svensson TH. 1997. Differential effects of acute and chronic nicotine on dopamine output in the core and shell of the rat nucleus accumbens. *Journal of Neural Transmission* 104:1–10.
- Olale F, Gerzanich V, Kuryatov R, Wang F, Lindstrom J. 1997. Chronic nicotine exposure differentially affects the function of human  $\alpha 3$ ,  $\alpha 4$ , and  $\alpha 7$  neuronal nicotinic receptor subtypes. *Journal of Pharmacology and Experimental Therapeutics* 283:675–683.
- Olinic A, Young DA, Freedman R. 1997. Increased levels of nicotine metabolite cotinine in schizophrenic smokers compared to other smokers. *Biological Psychiatry* 42:1–5.
- Panagis G, Hildebrand BE, Svensson TH, Nomikos GG. 1998. Selective c-fos induction and a decrease in dopamine release in the central nucleus of amygdala in rats displaying a mecamylamine-precipitated nicotine withdrawal syndrome. *Society for Neuroscience Abstracts* 24:750.
- Perry DC, Davila-Garcia MI, Stockmeier CA, Kellar KJ. 1999. Increased nicotinic receptors in brains from smokers: membrane binding and autoradiography studies. *Journal of Pharmacology and Experimental Therapeutics* 289:1545–1552.
- Piccio MR, Zoli M, Lena C, Bessis A, Lallemand Y, LeNovere N, Vincent P, Pich EM, Brulet P, Changeux JP. 1995. Abnormal avoidance learning in mice lacking functional high-affinity nicotine receptor in the brain. *Nature* 374:65–67.
- Piccio MR, Zoli M, Rimondini R, Lena C, Marubio E, Merlo-Pich E, Fuxe K, Changeux JP. 1998. Acetylcholine receptors containing the beta2 subunit are involved in the reinforcing properties of nicotine. *Nature* 391:173–177.
- Pich EM, Lorang M, Yeganeh M, Rodriguez de Fonseca F, Raber J, Koob GF, Weiss F. 1996. Increase of extracellular corticotropin-releasing factor-like immunoreactivity levels in the amygdala of awake rats during restraint stress and ethanol withdrawal as measured by microdialysis. *Journal of Neuroscience* 15:5439–5447.
- Pich EM, Pagliusi SR, Tessari M, Talabot-Ayer D, Hooft van Huijsduijn R, Chiamulera C. 1997. Common neural substrates for the addictive properties of nicotine and cocaine. *Science* 275:83–86.
- Pidoplichko VI, DeBiasi M, Williams JT, Dani JA. 1997. Nicotine activates and desensitizes midbrain dopamine neurons. *Nature* 390:401–404.
- Pierzchala K, Houdi AA, VanLoon GR. 1987. Nicotine-induced alterations in brain regional concentrations of native and cryptic met-enkephalin. *Peptides* 8:1035–1043.
- Pin JP, Duvoisin R. 1995. The metabotropic glutamate receptors: structure and functions. *Neuropharmacology* 34:1–26.
- Pomerleau CS, Pomerleau OF. 1992. Euphoriant effects of nicotine in smokers. *Psychopharmacology* 108:460–465.
- Pomerleau OF. 1998. Endogenous opioids and smoking: a review of progress and problems. *Psychoneuroendocrinology* 23:115–130.
- Pomerleau OF, Pomerleau CS. 1984. Neuroregulators and the reinforcement of smoking: towards a biobehavioral explanation. *Neuroscience and Biobehavioral Reviews* 8:503–513.
- Pomerleau OF, Rosecrans J. 1989. Neuroregulatory effects of nicotine. *Psychoneuroendocrinology* 14:407–423.
- Pomerleau OF, Adkins D, Pertschuk M. 1978. Predictors of outcome and relapse in smoking cessation treatment. *Addictive Behaviors* 3:65–70.
- Pontieri FE, Passarelli F, Calo L, Caronti B. 1998. Functional correlates of nicotine administration: similarity with drugs of abuse. *Journal of Molecular Medicine* 76:193–201.
- Pontieri FE, Tanda G, Orzi F, Di Chiara G. 1996. Effects of nicotine on the nucleus accumbens and similarity to those of addictive drugs. *Nature* 382:255–257.
- Prochazka AV, Weaver MJ, Keller RT, Fryer GE, Licari PA, Lofaso D. 1998. A randomized trial of nortriptyline for smoking cessation. *Archives of Internal Medicine* 158:2035–2039.
- Rapier C, Lunt GG, Wonnacott S. 1990. Nicotinic modulation of [3H] dopamine release from striatal synaptosomes: pharmacological characterisation. *Journal of Neurochemistry* 54:937–945.
- Rasmussen K, Czachura JF. 1995. Nicotine withdrawal leads to increased firing rates of midbrain dopamine neurons. *Neuroreport* 7:329–332.
- Rasmussen K, Czachura JF, Kallman MJ, Helton DR. 1996. The CCK-B antagonist LY288513 blocks the effects of nicotine withdrawal on auditory startle. *Neuroreport* 7:1050–1052.
- Rasmussen K, Kallman MJ, Helton DR. 1997. Serotonin-1A antagonists attenuate the effects of nicotine withdrawal on the auditory startle response. *Synapse* 27:145–152.
- Reitstetter R, Lukas RJ, Gruener R. 1999. Dependence of nicotinic acetylcholine receptor recovery from desensitization on the duration of agonist exposure. *Journal of Pharmacology and Experimental Therapeutics* 289:656–660.
- Ribeiro EB, Bettiker RL, Bogdanov M, Wurtman RJ. 1993. Effects of systemic nicotine on serotonin release in rat brain. *Brain Research* 621:311–318.
- Richter RM, Weiss F. 1999. In vivo CRF release in rat amygdala is increased during cocaine withdrawal in self-administering rats. *Synapse* 32:254–261.
- Roberts DCS, Koob GF. 1982. Disruption of cocaine self-administration following 6-hydroxydopamine lesions of the ventral tegmental

- area in rats. *Pharmacology, Biochemistry and Behavior* 17:901–904.
- Roberts DCS, Koob GF, Klonoff P, Fibiger HC. 1980. Extinction and recovery of cocaine self-administration following 6-hydroxydopamine lesion of the nucleus accumbens. *Pharmacology, Biochemistry and Behavior* 12:781–787.
- Rodriguez de Fonseca F, Carrera MRA, Navarro M, Koob GF, Weiss F. 1997. Activation of corticotropin-releasing factor in the limbic system during cannabinoid withdrawal. *Science* 276:2050–2054.
- Rossetti ZL, Hmaidan Y, Gessa GL. 1992. Marked inhibition of mesolimbic dopamine release: a common feature of ethanol, morphine, cocaine, and amphetamine abstinence in rats. *European Journal of Pharmacology* 221:227–234.
- Russell MA. 1989. Subjective and behavioural effects of nicotine in humans: some sources of individual variation. *Progress in Brain Research* 79:289–302.
- Sandyk R. 1993. Cigarette smoking: effects on cognitive functions and drug-induced parkinsonism in chronic schizophrenia. *International Journal of Neuroscience* 70:193–197.
- Sargent PB. 1993. The diversity of neuronal nicotinic acetylcholine receptors. *Annual Review of Neuroscience* 16:403–443.
- Sarnyai Z, Biro E, Gardi J, Vecsernyes M, Julesz J, Telegdy G. 1995. Brain corticotropin-releasing factor mediates 'anxiety-like' behavior induced by cocaine withdrawal in rats. *Brain Research* 675:89–97.
- Schildstrom B, Nomikos GG, Nisell M, Hertel P, Svensson TH. 1998. N-methyl-aspartate receptor antagonism in the ventral tegmental area diminishes the systemic nicotine-induced dopamine release in the nucleus accumbens. *Neuroscience* 82:781–789.
- Schulteis G, Markou A, Cole M, Koob GF. 1995. Decreased brain reward produced by ethanol withdrawal. *Proceedings of the National Academy of Sciences USA* 92:5880–5884.
- Schulteis G, Markou A, Gold LH, Stinus L, Koob GF. 1994. Relative sensitivity to naloxone of multiple indices of opiate withdrawal: a quantitative dose–response analysis. *Journal of Pharmacology and Experimental Therapeutics* 271:1391–1398.
- Schwartz RD, Lehmann J, Kellar KJ. 1984. Presynaptic nicotinic cholinergic receptors labeled by [3H]acetylcholine on catecholamine and serotonin axons in the brain. *Journal of Neurochemistry* 42:1495–1498.
- Segal DS, Mandell AJ. 1974. Long-term administration of d-amphetamine: progressive augmentation of motor activity and stereotypy. *Pharmacology, Biochemistry and Behavior* 2:249–255.
- Seguela P, Wadiche J, Dineley-Miller K, Dani JA, Patrick JW. 1993. Molecular cloning, functional properties, and distribution of rat brain  $\alpha 7$ : a nicotinic cation channel highly permeable to calcium. *Journal of Neuroscience* 13:596–604.
- Sellers EM, Naranjo C, Kadlec K. 1987. Do serotonin uptake inhibitors decrease smoking? Observations in a group of heavy smokers. *Journal of Clinical Psychopharmacology* 7:417–420.
- Shiffman SM, Jarvik ME. 1976. Smoking withdrawal symptoms in two weeks of abstinence. *Psychopharmacology* 50:35–39.
- Shoaib M, Stolerman IP. 1996. The NMDA antagonist dizocilpine (MK-801) attenuates tolerance to nicotine in rats. *Journal of Psychopharmacology* 10:214–218.
- Shoaib M, Benwell ME, Akbar MT, Stolerman IP, Balfour DJ. 1994. Behavioral and neurochemical adaptations to nicotine in rats: influence of NMDA antagonists. *British Journal of Pharmacology* 111:1073–1080.
- Shoaib M, Schindler CW, Goldberg SR, Pauly JR. 1997. Behavioral and biochemical adaptations to nicotine in rats: influence of MK-801, an NMDA receptor antagonist. *Psychopharmacology* 134:121–130.
- Solomon RL, Corbit JD. 1974. An opponent-process theory of motivation, I: temporal dynamics of affect. *Psychological Review* 81:119–145.
- Spanagel R, Almeida OFX, Bartl C, Shippenberg TS. 1994. Endogenous  $\kappa$ -opioid systems in opiate withdrawal: role in aversion and accompanying changes in mesolimbic dopamine release. *Psychopharmacology* 115:121–127.
- Stahl SM. 1997. *Essential Psychopharmacology*. New York: Cambridge University Press, pp. 185–188.
- Steinbusch HW. 1981. Distribution of serotonin-immunoreactivity in the central nervous system of the rat-cell bodies and terminals. *Neuroscience* 6:557–618.
- Stellar JR, Rice MB. 1989. Pharmacological basis of intracranial self-stimulation reward. In Liebman JM, Cooper SJ, eds. *The Neuropharmacological Basis of Reward*. Oxford: Clarendon Press, pp. 14–65.
- Stevens KE, Johnson RG, Rose GM. 1997. Rats reared in social isolation show schizophrenia-like changes in auditory gating. *Pharmacology, Biochemistry and Behavior* 58:1031–1036.
- Stolerman IP, Bunker P, Jarvik ME. 1974. Nicotine tolerance in rats: role of dose and dose interval. *Psychopharmacologia* 34:317–324.
- Stolerman IP. 1991. Behavioural pharmacology of nicotine: multiple mechanisms. *British Journal of Addiction* 86:533–536.
- Stolerman IP, Jarvis MJ. 1995. The scientific case that nicotine is addictive. *Psychopharmacology* 117:2–10.
- Stolerman IP, Fink R, Jarvik ME. 1973. Acute and chronic tolerance to nicotine as measured by activity in rats. *Psychopharmacologia* 30:329–342.
- Substance Abuse and Mental Health Services Administration. 1993. *National Household Survey on Drug Abuse: Population Estimates 1992*. Substance Abuse and Mental Health Services Administration, Office of Applied Studies, Table 14A. Rockville, MD.
- Svensson TH, Grenhoff J, Engberg G. 1990. Effect of nicotine on dynamic function of brain catecholaminergic neurons. In: *The Neurobiology of Nicotine Dependence* (Series title: Ciba Foundation Symposium, Vol. 152). Wiley: Chichester, pp. 169–185.
- Swan GE, Ward MM, Jack LM. 1996. Abstinence effects as predictors of 28-day relapse in smokers. *Addictive Behaviors* 21:481–490.
- Swanson LW, Simmons DM, Whiting PJ, Lindstrom J. 1987. Immunohistochemical localization of neuronal nicotinic receptors in the rodent central nervous system. *Journal of Neuroscience* 7:3334–3342.
- Swerdlow NR, Geyer MA. 1993. Clozapine and haloperidol in an animal model of sensorimotor gating deficits in schizophrenia. *Pharmacology, Biochemistry and Behavior* 44:741–744.
- Swerdlow NR, Geyer MA. 1998. Using an animal model of deficient sensorimotor gating to study the pathophysiology and new treatments of schizophrenia. *Schizophrenia Bulletin* 4:285–301.
- Swerdlow NR, Braff DL, Geyer MA, Koob GF. 1986. Central dopamine hyperactivity in rats mimics abnormal acoustic startle response in schizophrenics. *Biological Psychiatry* 21:23–33.
- Swerdlow NR, Braff DL, Geyer MA. 1990. GABAergic projection from nucleus accumbens to ventral pallidum mediates dopamine-induced sensorimotor gating deficits of acoustic startle in rats. *Brain Research* 532:146–150.
- Swerdlow NR, Caine SB, Geyer MA. 1992. Regionally selective effects of intracerebral dopamine infusion on sensorimotor gating of the startle reflex in rats. *Psychopharmacology* 108:189–195.
- Sziraki I, Sershen H, Benuck M, Hashim A, Lajtha A. 1998. Receptor systems participating in nicotine-specific effects. *Neurochemistry International* 33:445–457.
- Tempel A, Zukin RS. 1987. Neuroanatomical patterns of the mu, delta, and kappa opioid receptors of rat brain as determined by quantitative in vitro radiography. *Proceedings of the National Academy of Sciences USA* 84:4308–4312.
- Terenius L. 1992. Opioid peptides, pain and stress. *Progress in Brain Research* 92:375–383.
- Trujillo KA, Akil H. 1995. Excitatory amino acids and drugs of abuse: a role for N-methyl-aspartate receptors in drug tolerance, sensitization, and physical dependence. *Drug and Alcohol Dependence* 38:139–154.
- United States Department of Health and Human Services. 1988. *The Health Consequences of Smoking: Nicotine Addiction*. A report of the Surgeon General. US Government Printing Office, Washington, D.C.
- Usuda I, Tanaka K, Chiba T. 1998. Efferent projections of the nucleus accumbens in the rat with special reference to subdivision of the nucleus: biotinylated dextran amine study. *Brain Research* 797:73–93.
- Waal-Manning HJ, de Hamel FA. 1978. Smoking habit and psychometric scores: a community study. *New Zealand Medical Journal* 88:188–191.
- Wada E, Wada K, Boulter J, Deneris E, Heinemann S, Patrick J, Swanson LW. 1989. Distribution of  $\alpha 2$ ,  $\alpha 3$ ,  $\alpha 4$ , and  $\beta 2$  neuronal nicotinic receptor subunit mRNAs in the central nervous system: a hybridization histochemical study in the rat. *Journal of Comparative Neurology* 284:314–355.
- Walaas I, Fonnun F. 1980. Biochemical evidence for gamma-aminobutyrate containing fibers from the nucleus accumbens to the substantia nigra and ventral tegmental area in the rat. *Neuroscience* 5:63–72.
- Watkins SS, Epping-Jordan N, Koob GF, Markou A. 1999. Blockade of nicotine self-administration with nicotinic antagonists in rats. *Pharmacology, Biochemistry and Behavior* 62:743–751.

- Watkins SS, Stinus L, Koob GF, Markou A. 2000. Reward and somatic changes during precipitated nicotine withdrawal in the rat: central and peripheral mechanisms. *Journal of Pharmacology and Experimental Therapeutics*, 292:1053–1064.
- Weinberger DR, Berman KF, Illowsky BP. 1988. Physiological dysfunction of dorsolateral prefrontal cortex in schizophrenia, III: a new cohort and evidence for a monoaminergic mechanism. *Archives of General Psychiatry* 45:609–615.
- Weiss F, Markou A, Lorang MT, Koob GF. 1992. Basal extracellular dopamine levels in the nucleus accumbens are decreased during cocaine withdrawal after unlimited-access self-administration. *Brain Research* 593:314–318.
- Weiss F, Parsons LH, Schulteis G, Hyttia P, Lorang MT, Bloom FE, Koob GF. 1996. Ethanol self-administration restores withdrawal-associated deficiencies in accumbal dopamine and 5-hydroxytryptamine release in dependent rats. *Journal of Neuroscience* 16:3474–3485.
- Wiley JL. 1998. Nitric oxide synthase inhibitors attenuate phencyclidine-induced disruption of prepulse inhibition. *Neuropsychopharmacology* 19:86–94.
- Wirshing WC, Engle J, Levin E, Cummings JL, Rose J. 1989. The acute effects of smoking on tardive dyskinesia. *New Research Program and Abstracts, 142nd Annual Meeting of the American Psychiatric Association*, San Francisco, CA.
- Wonnacott S. 1990. The paradox of nicotinic acetylcholine receptor upregulation by nicotine. *Trends in Pharmacological Sciences* 11:216–219.
- Wonnacott S. 1997. Presynaptic nicotinic ACh receptors. *Trends in Neurosciences* 20:92–98.
- Yassa R, Lal S, Korpassy A, Ally J. 1987. Nicotine exposure and tardive dyskinesia. *Biological Psychiatry* 22:67–72.
- Yeomans J, Baptista M. 1997. Both nicotinic and muscarinic receptors in the ventral tegmental area contribute to brain-stimulation reward. *Pharmacology, Biochemistry and Behavior* 57:915–921.
- Yeomans J, Mathur A, Tampakeras M. 1993. Rewarding brain stimulation: role of tegmental cholinergic neurons that activate dopamine neurons. *Behavioral Neuroscience* 107:1077–1087.
- Yim CY, Mogenson GJ. 1980. Electrophysiological studies of neurons in the ventral tegmental area of Tsai. *Brain Research* 181:301–313.
- Young SN, Smith SE, Pihl RO, Ervin FR. 1985. Tryptophan depletion causes a rapid lowering of mood in normal males. *Psychopharmacology* 87:173–177.
- Zoli M, Lena C, Picciotto MR, Changeux JP. 1998. Identification of four classes of brain nicotinic receptors using  $\beta 2$  mutant mice. *Journal of Neuroscience* 18:4461–4472.
